# 1 Factors supporting the primary care physicians' performance in 2 Benin: a multiple case study

3  
4 Kéfilath Bello<sup>123\*</sup>, Jan De Lepeleire<sup>3</sup>, Djimon Marcel Zannou<sup>4</sup>, Bart Criel<sup>2</sup>

5  
6 1 Centre de Recherche en Reproduction Humaine et en Démographie, Cotonou, Benin

7 2 Department of Public Health, Institute of Tropical Medicine, Antwerp, Belgium

8 3 Department of Public Health and Primary Care, General Practice, Katholieke Universiteit  
9 Leuven, Belgium

10 4 Faculté des Sciences de la Santé, Université d'Abomey-Calavi, Benin

11

12 \*Corresponding author: Kéfilath Bello, [kbello@cerrhud.org](mailto:kbello@cerrhud.org)

## 13 Abstract

### 14 Introduction

15 In Benin, as in many African countries, there is a gradual increase in physicians practising at  
16 the primary care level. A literature review showed that these primary care physicians (PCPs)  
17 have great potential for improving the quality of care. However, several conditions are  
18 necessary for this potential to be unlocked and for the PCPs to contribute effectively to  
19 strengthen their local health system. This study aims to understand the factors that underpin  
20 the performance of PCPs in Benin.

### 21 Methods

22 We conducted a multiple case study in which we analysed eight contrasting PCP practices  
23 spread across five health districts in Benin. The study used a combination of quantitative and  
24 qualitative methods. We collected quantitative data through direct observations of the  
25 services provided by the PCPs. A descriptive statistical analysis of these data helped to assign  
26 performance scores to each PCP's practices (for the technical quality of services and  
27 communication with patients). For the qualitative data collection, we conducted 40 in-depth  
28 interviews and 16 focus group discussions with PCPs, other health workers, health  
29 authorities, local authorities and other community members. This qualitative data was  
30 subjected to thematic content analysis to identify the factors that might explain the  
31 observed performances. We then constructed a matrix presenting all the cases studied and  
32 the potential performance factors. Finally, we carried out a cross-case analysis to identify the  
33 most critical factors supporting the performance of PCPs in Benin.

### 34 Results:

35 The PCPs' performance scores ranged from 14.7 to 19.3 (out of 20) for communication and  
36 from 68% to 88% (out of 100%) for technical quality of care. Out of 14 potential performance  
37 factors retained after the first phase of the qualitative analysis, cross-analysis revealed nine  
38 factors that appeared to be essential in supporting the performance of PCPs in Benin in both  
39 the public and private sectors. These were (i) the values supporting the PCPs' practices, (ii)

40 the PCPs' preparation to practice at first- line, (iii) the support provided to the PCPs from the

NOTE: This preprint reports new research that has not been certified by peer review and should not be used to guide clinical practice.

41 hierarchy, peers or professional associations, (iv) the leadership mandate given to the PCPs  
42 and the degree of autonomy allocated to exert it, (v) the modalities of the financing of the  
43 PCPs' practices, (vi) the accountability mechanisms in place to support the PCPs' practices,  
44 (vii) the PCPs' relationship with the rest of the primary care team and their leadership style,  
45 (viii) the PCPs' collaboration with community leaders and other public officials, and (ix) the  
46 context in which the PCP's practices are embedded.

47 **Conclusion:**

48 This study has enabled the identification of a series of factors that could act as levers for  
49 improving the practice of PCPs in Benin.

50 **Keywords**

51 Primary care physicians, health workers performance, primary health care, Benin.

52

## 53 Introduction

54 Like the rest of the international community, African governments have committed to  
55 ensuring healthy lives and promoting well-being for all their citizens (1). This goal cannot be  
56 achieved without well-trained, motivated, available, and properly distributed human  
57 resources for health (2). While the shortage of health workers is the most visible and  
58 debated issue when it comes to human resources for health in Africa (2), the sub-optimal  
59 utilization and performance of the existing workforce is an important, yet often unnoticed,  
60 problem. Notably, recent years have seen a growing presence of physicians at African  
61 primary care facilities (3,4), whereas the dominating policy choice (still) favors task-shifting  
62 and provision of primary care services by nurse-practitioners (5,6). This situation results from  
63 a combination of physician training efforts by African universities, governments' limited  
64 capacity to recruit and position them at higher healthcare levels, limited access to  
65 specialized training, and expansion of the private sector (7). This growing presence of  
66 primary care physicians (PCPs) in Africa is mainly observed in the private sector (and in urban  
67 areas) as a spontaneous, opportunistic, and poorly planned movement. However, there are  
68 a few cases where the PCPs are positioned as part of the academic development of family  
69 medicine or as part of a governmental choice to improve health systems' outcomes (4). For  
70 example, the Beninese government recently launched a program to post physicians in some  
71 of the largest primary care facilities that were previously staffed by non-physicians. The aim  
72 of this program is, among others, to improve quality of care and financial viability of these  
73 facilities. However, little is known on the ability of these physicians to contribute to these  
74 goals.

75 Several scholars have indicated that PCPs have a good potential for improving the quality of  
76 primary care in sub-Saharan Africa and the well-being of the population (4,8–10). In many  
77 settings, PCPs improved the technical quality of care (11,12), the access to care for complex  
78 conditions (11,13,14), and the clinical processes through training and supervision of non-  
79 physicians (13). They were also able to innovate during the COVID-19 pandemic and support  
80 the country responses (8,10). However, there is also evidence that PCPs in African countries  
81 sometimes perform poorly, especially when it comes to key features of good primary care,  
82 such as patient-centeredness, (financial) accessibility (15,16), technical quality of care (16–  
83 18), continuity of care (9,19), comprehensiveness, coordination, and community  
84 engagement (13,17). Moreover, the bulk of African PCPs work in urban areas and in the  
85 private sector, which threatens the equitable access to the services they provide (4,8). These  
86 performance issues are alarming as they may lead to inefficiencies, given that PCPs remain a  
87 relatively rare and expensive source of care.

88 Fortunately, the current evidence indicates that, under certain conditions, the potential of  
89 PCPs can be unleashed to improve primary care in African countries. Indeed, the PCPs'  
90 practices are diverse across various settings, and the literature report positive outcomes for  
91 the practice models that are relatively better organized and guided by a set of clear  
92 principles and governance arrangements. This is for instance the case for family physicians  
93 who receive a 2 to 4 years post-graduate training in family medicine, or for the "*Médecins*

94 *Généralistes Communautaires*” who are community-based physicians serving in rural areas  
95 of some francophone Africa countries (4) or even physicians without a specific postgraduate  
96 training but who have received some degree of governance guidance (20). Therefore,  
97 understanding which factors influence the PCPs performance in a given context could help to  
98 better guide and improve their practices. This is especially important in countries, like Benin  
99 and many other African countries, where primary care delivery largely relies on non-  
100 physicians and where the PCPs still remain relatively scarce.

101  
102 A review of the PCPs’ practices in sub-Saharan Africa, taking a health system lens (4), helped  
103 identify potential factors that could influence PCPs’ practices positively or negatively. The  
104 professional identity of the PCPs includes the values underlying their practice, their  
105 motivation to work as PCP, and their educational and professional trajectory, which is likely  
106 to influence the way they perform in relation to primary care. Governance factors such as  
107 the existence of policy guidance, clear role definitions, resource allocation modalities,  
108 incentives and other accountability mechanisms may also influence PCPs’ performance. The  
109 way PCPs’ activities are organized and their relationships with other primary care team  
110 members, local health authorities, community members and other key stakeholders are  
111 additional factors that can influence their performance. The work environment (tools,  
112 equipment, infrastructure, etc.) and the overall context (rural, urban, poverty, overall health  
113 systems performance, etc.) can also influence PCPs’ performance.

114  
115 The literature examining PCPs’ performance outside Africa also suggest similar factors, but it  
116 usually regroups these factors into physicians’ personal and professional characteristics on  
117 the one hand, and organizational and systemic factors on the other (21). The physicians’  
118 characteristics most often pertain to their training and professional experience, and to a  
119 lesser extent to their age and gender. The organizational and systemic factors include the  
120 organization of the physicians’ practices (role and task distribution with other staff for  
121 instance), their workload, the availability of adequate infrastructure and equipment, and the  
122 features of the local health system in which the PCPs’ practices are embedded. The  
123 organizational and systemic factors are reported to play a greater part in physicians’  
124 performance than their personal characteristics (21). The specific factors (or combination of  
125 factors) that influence PCPs’ practices in sub-Saharan African countries are barely known.  
126 Most of the publications on PCPs’ practices in Sub-Saharan Africa refer to the Republic of  
127 South Africa and a limited number of other anglophone countries such as Nigeria, Kenya, or  
128 Ethiopia (4).

129  
130 Our study aims to better understand the factors that support the PCPs’ performance in  
131 Benin (West Africa). We define performance as the PCPs’ ability (individually and together  
132 with the rest of the primary care team) to provide care that is in line with the key features of  
133 good primary care and to contribute to the good functioning of the local health system in  
134 which they practice. The research questions are: (1) What is the performance of selected

135 PCPs' practices in Benin?; (2) Which factors are perceived by a range of stakeholders to  
136 influence performance?; (3) What are the factors highlighted by the cross case-analysis  
137 most likely to contribute to PCPs offer of quality primary care in Benin?

## 138 **Methods**

### 139 **Study design**

140 This is a multiple-case study, using a combination of quantitative and qualitative methods.  
141 For this multiple-cases study, we defined the case as the performance of a given PCP (see  
142 the objectives at the end of the introduction section).  
143

### 144 **Selection of the study sites**

145 To address the research questions, we needed to contrast various performance levels (good,  
146 average and poor) and observe multiple potential influencing factors. Therefore, we  
147 purposively selected 8 cases. For each case, a study site was selected using following the  
148 steps described below.

#### 149 *Step 1: Defining sets of variables to use as criteria to appraise PCPs' performance*

150 Because our objective was to include a range of study sites with different performance  
151 levels, we needed criteria to help us predict the performance of the PCPs in our database. As  
152 a result of previous studies (8,28), we had access to a database of 150 PCPs. A factor analysis  
153 from this database helped us to identify three criteria. Each criterion comprises a set of  
154 variables (see supplementary file 1). The first criterion is related to the practice of quality  
155 improvement and public health activities. The second criterion is related to the availability of  
156 essential health services (i.e. those defined in the Benin national guidelines as high-impact  
157 interventions) at affordable cost. The third criterion related to the self-rated satisfaction of  
158 the PCP. We wish to emphasize that we did not aim to construct a scientifically validated  
159 tool to assess PCPs' performance but rather to find a pragmatic approach to establish a level  
160 of contrast between individual PCPs deemed sufficient for our specific study purpose.  
161

#### 162 *Step 2: Predicting the PCP performance based on each criterion*

163 For each PCP, we calculated a score for each criterion, integrating the values of the variables  
164 composing this criterion. A score was considered low when below the mean score for a given  
165 criterion minus the standard deviation ( $\text{score} < \mu - \sigma$ ). A medium score was a score situated  
166 between the mean minus the standard deviation and the mean plus the standard deviation  
167 ( $\mu - \sigma < \text{score} < \mu + \sigma$ ). A high score was higher than the mean plus standard deviation ( $\text{score} >$   
168  $\mu + \sigma$ ).  
169

#### 170 *Step 3: Purposive selection of the PCPs to be included.*

171 We purposively selected 8 PCPs aiming for a large mix: 2 PCPs with high scores for at least  
 172 two criteria, 3 PCPs with medium scores across the criteria, and 3 PCPs with low scores for at  
 173 least 2 criteria. In order to have a sufficiently large variation of cases, we also considered the  
 174 gender and postgraduate training, if any, of PCPs, the institutional ownership of the facility  
 175 where the PCPs practice, and the geographic position and the urbanization level of the  
 176 facility's location.

177 Table 1 presents the characteristics of each of the 8 study sites, representing the 8 cases  
 178 studied.

179  
 180  
 181  
 182  
 183

184 *Table 1: Characteristics of the study sites*

| Case ID | Gender of the PCP | Geographic localisation in Benin | Population of the borough where the facility is located | Urbanization level | Ownership of the facility     | Post graduate training                    |
|---------|-------------------|----------------------------------|---------------------------------------------------------|--------------------|-------------------------------|-------------------------------------------|
| Case 1  | F                 | South                            | 57 962                                                  | Urban              | Church                        | None                                      |
| Case 2  | F                 | South                            | 57 691                                                  | Urban              | Para-governmental institution | None                                      |
| Case 3  | M                 | South                            | 78 474                                                  | Urban              | Government                    | Medical specialty                         |
| Case 4  | M                 | South                            | 10 527                                                  | Semi-urban         | Government                    | None                                      |
| Case 5  | M                 | North                            | 69 799                                                  | Urban              | Private (individual)          | None                                      |
| Case 6  | M                 | North                            | 22 291                                                  | Rural              | Private (individual)          | Certificate in community general practice |
| Case 7  | F                 | North                            | 15 804                                                  | Rural              | Private (individual)          | MGC                                       |
| Case 8  | F                 | North                            | 15 927                                                  | Semi-urban         | Government                    | None                                      |

185 **Study settings**

186 The study sites are spread across five health districts in Benin (figure 2). Three districts are  
187 urban: Cotonou 2-3 (Cot 2-3), Cotonou 5 (Cot 5) and Parakou-N'Dali (PN); and the two  
188 others are predominantly rural: Ouidah-Kpomassè-Tori (OKT), and Nikki-Kalalé-Pèrèrè (NKP).

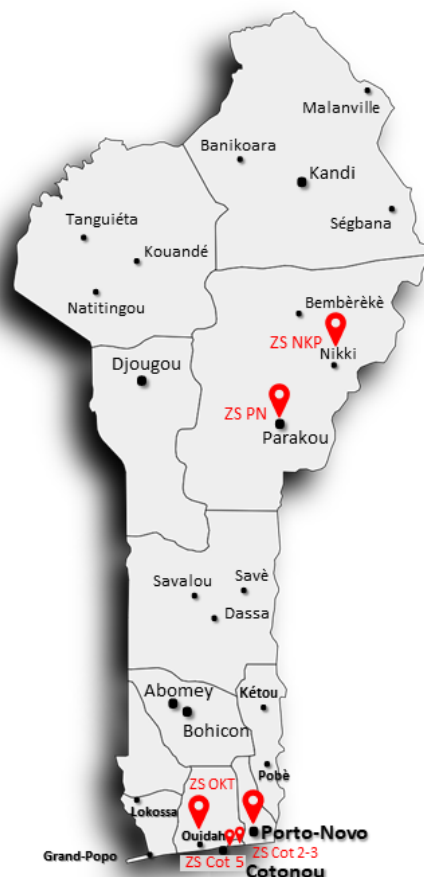

189  
190  
191 *Figure 1: Benin's health districts where the study was conducted*

192  
193 **Conceptual framework**

194 The conceptual framework (figure 1) used for this study was iteratively constructed based on  
195 the Donabedian model (23), a scoping review previously conducted by the research team (4)  
196 and relevant literature on primary health care and health systems (24,25). We also  
197 integrated in the framework the factors described in the literature (see above) as influencing  
198 PCPs' practices.

199  
200 In this framework, the outcomes box regroups the range of performance dimensions of PCPs  
201 and their teams that we assessed in this study: technical effectiveness, patient-  
202 centeredness, accessibility of the PCP's services, continuity of care, community-engagement,  
203 the PCP's capacity to strengthen the primary care team and the facility as a whole, and the  
204 contribution of the PCP's practices to strengthen the local health system. The first five

205 dimensions are widely used to assess primary care performance (26,27) and we have chosen  
206 them because the ultimate goal of this work is to improve the contribution of general  
207 practitioners to quality primary care in Benin and Africa. These dimensions were also  
208 perceived by Beninese stakeholders as key to judge the PCPs' performance. The PCPs'  
209 capacity to strengthen the primary care team and the facility and their contribution to  
210 strengthen the local health system are less commonly used to assess the performance of the  
211 primary physicians or primary care workforce in general. However, they were deemed  
212 important by the stakeholders in Benin because the PCPs are usually seen as the leader of  
213 their teams and because their work is meant to support the performance of the local health  
214 system, which role is to improve the health well-being of the population within their  
215 boundaries.

216  
217 It is important to note that all these performance dimensions, apart from the PCPs' capacity  
218 to strengthen primary care teams and facilities, include not only the individual performance  
219 of the PCPs, but also that of the primary care team. Indeed, as PCPs rarely work alone in  
220 Benin, it would not be appropriate to assess their individual performance in isolation.

221  
222 From the literature (4,21,24,25), we identified a number of factors that can potentially  
223 influence PCPs' performance. We regrouped them into three categories: first, elements  
224 pertaining to the professional identity of the PCPs; second, governance features of their  
225 practice; and third, the nature of activities conducted and roles played in the local health  
226 system (see figure 1).

227  
228



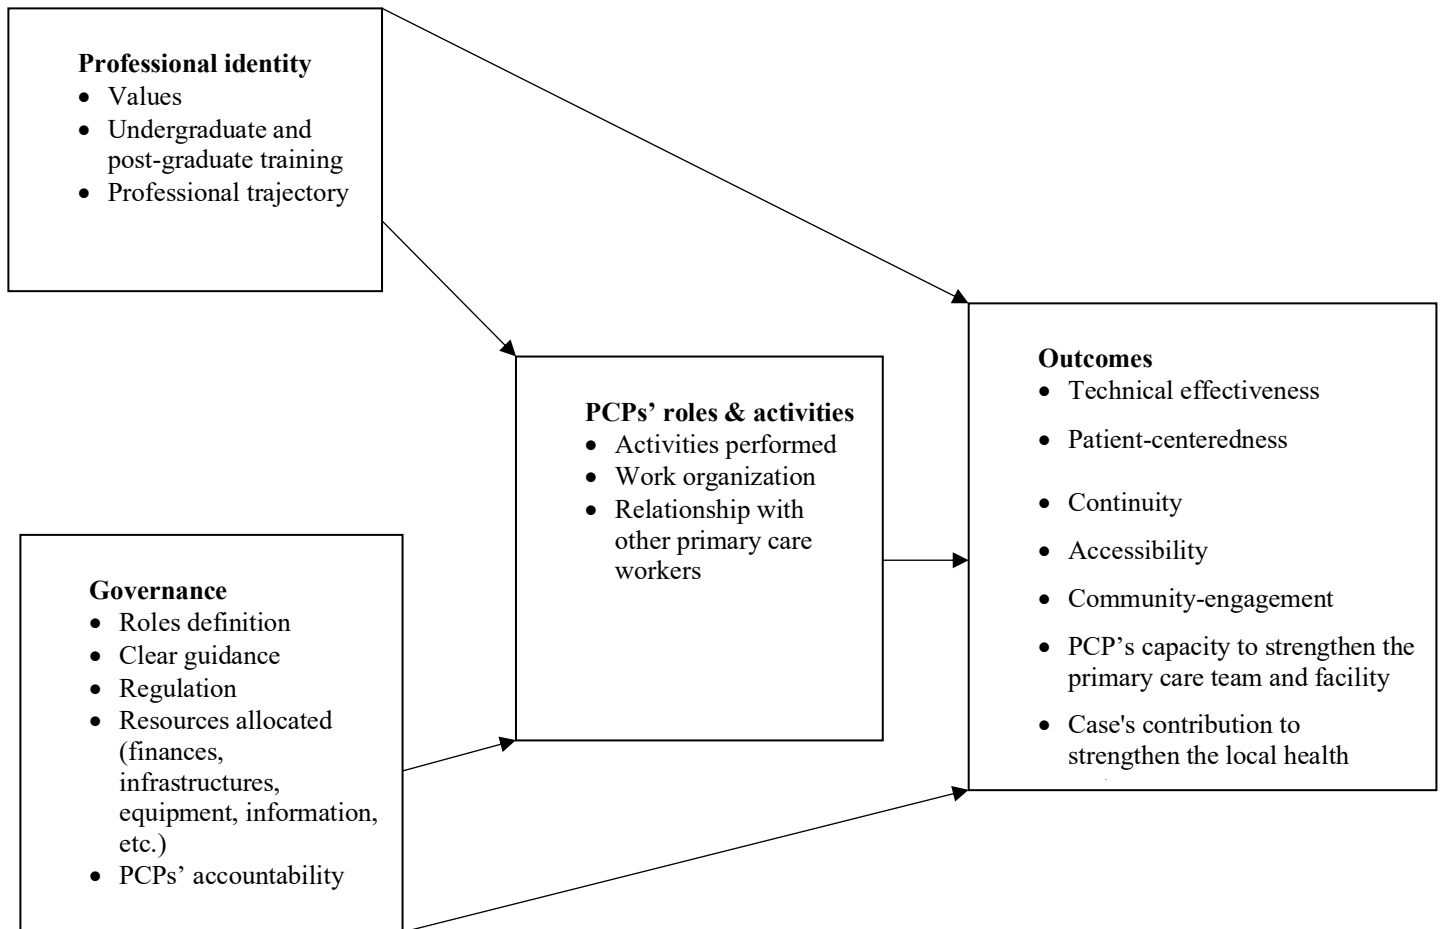

Figure 2: conceptual framework

230 **Data collection**

231 *Quantitative data collection*

232 The quantitative data served to respond to research question 1. We collected this data  
233 through direct observations of the curative out-patient consultations conducted by each of  
234 the 8 PCPs. The consultations were observed by a physician present in the consultation  
235 room, using a structured observation grid. This grid was developed based on two tools: the  
236 Global Consultation Rating Scale, which is a validated scale for assessing physician-patient  
237 communication and patient-centeredness (29), and another tool for assessing the quality of  
238 the clinical examination based on care protocols used in Benin (30). The observation grid  
239 helped us to quantitatively assess two essential primary care dimensions: patient-  
240 centeredness of care and its technical effectiveness. We pre-tested the grid with five PCPs  
241 working outside of our study area to assess the relevance of these items. Feedback from  
242 these physicians was used to further improve the grids. Feedback was also given by a  
243 biostatistician. The physician who observed the consultations was trained for that purpose  
244 and conducted 10 observations together with the principal investigator (KB) prior to the  
245 actual data collection. They compared their scores for each of the 10 consultations.  
246 Discrepancies were discussed to ensure common understanding of both tools. Each PCP was  
247 observed for three consecutive days, selected as much as possible in the busiest period. Our  
248 aim was to observe at least 20 consultations. We achieved this goal for all PCPs except in site  
249 7. The number of consultations observed for each PCP is displayed in table 2.

250

251 *Qualitative data collection*

252 The qualitative data was collected through individual in-depth interviews (IDI) and focus  
253 group discussions (FGD), using individual and group interview guides. These guides included  
254 questions pertaining to all our research questions. For research question 1, we asked key  
255 informants' opinion on the performance of the PCPs and their respective teams. For  
256 research question 2, we explored the respondents' perceptions on the factors that  
257 influenced (either positively or negatively) the performance of the PCPs studied. For  
258 research question 3, the interviews provided information on the factors that could possibly  
259 influence the PCPs' performance: their professional trajectory; their relationships with other  
260 team members, local health authorities, and community members; their activities; the  
261 organization of the primary care team; the type of support PCPs received; the accountability  
262 mechanisms, etc. For research question 3, we complemented the interviews with field  
263 observations. The latter provided information related to the PCPs' work environment, the  
264 equipment and infrastructure available, and the work organization of the PCPs and their  
265 teams.

266

267 For each PCP, key informants were selected from the following groups:

- 268 - All 8 PCPs (IDI)

- 269 - Other primary care workers operating in the health facility where the PCPs are based,  
 270 including other physicians, nurses, midwives, nurse aids, and where available, non-  
 271 clinical staff (IDI and FGD)  
 272 - Local district health authorities (IDI)  
 273 - Patients and other community members, including local and religious leaders,  
 274 community health workers, and representatives of community-based organizations  
 275 (IDI and FGD).

276 We respected the principle of maximum variation so as to have a diverse sample. The key  
 277 informants shared information related to each of the three research questions. In total, we  
 278 conducted 40 IDIs and 16 FGDs. The latter included 8 FGDs with 54 primary care workers  
 279 and 8 FGDs with 63 community members (table 2).

280 To ensure a deep understanding of the PCPs’ practices and performance, the principal  
 281 investigator (KB) and the research assistants spent two months to study the PCPs’ practices  
 282 in their specific context. Moreover, KB kept in touch with the PCPs several months after the  
 283 data collection for follow-up questions, when relevant.

284  
 285  
 286

*Table 2: Number of consultations observed and number of participants to the interviews*

| Case ID | Observations<br>Number of consultations observed | Number of participants to the in-depth interviews (IDIs) |                           |                          |          |            | Number of participants to the Focus group discussions (FGDs) |                                    |
|---------|--------------------------------------------------|----------------------------------------------------------|---------------------------|--------------------------|----------|------------|--------------------------------------------------------------|------------------------------------|
|         |                                                  | PCPs studied                                             | Primary care team members | Local health authorities | Patients | Total IDIs | Primary care team (1 FGD per case)                           | Community members (1 FGD per case) |
| Case 1  | 30                                               | 1                                                        | 1                         | 1                        | 2        | 5          | 6                                                            | 8                                  |
| Case 2  | 25                                               | 1                                                        | 1                         | 1                        | 1        | 5          | 6                                                            | 7                                  |
| Case 3  | 26                                               | 1                                                        | 1                         | 1                        | 2        | 5          | 8                                                            | 7                                  |
| Case 4  | 21                                               | 1                                                        | 1                         | 0                        | 2        | 4          | 6                                                            | 7                                  |
| Case 5  | 22                                               | 1                                                        | 1                         | 1                        | 2        | 5          | 7                                                            | 7                                  |
| Case 6  | 25                                               | 1                                                        | 2                         | 1                        | 2        | 6          | 7                                                            | 10                                 |
| Case 7  | 11                                               | 1                                                        | 1                         | 0                        | 2        | 4          | 4                                                            | 9                                  |
| Case 8  | 20                                               | 1                                                        | 2                         | 1                        | 2        | 6          | 10                                                           | 8                                  |
| Total   | 180                                              | 8                                                        | 10                        | 6                        | 16       | 40         | 54                                                           | 63                                 |

287

## 288 **Data analysis**

### 289 **Research question 1**

290 We determined the performance of each PCP, including the individual performance of the  
 291 PCPs as well as the performance of the primary care team as a whole.

292

293 For the individual performance of the PCPs, we analyzed the quantitative data using  
 294 descriptive statistics. For each PCP, we then determined the mean communication score  
 295 following the instructions of the Global Consultation rating Scale (29), and we determined

296 the percentage of recommended clinical actions effectively performed in line with the  
297 prevailing care protocols in the country.

298

299 For the performance of the primary care team as a whole, we analyzed the qualitative data.  
300 Most IDIs and FGD were recorded and transcribed verbatim. Summaries were immediately  
301 produced after the interviews that were not recorded because the participant did not feel  
302 comfortable with the recording. The research team kept a daily log, using a tool developed  
303 in Microsoft Forms, reporting all research activities performed, and storing observation  
304 notes. We uploaded the transcripts in the Dedoose software (32) and performed a thematic  
305 content analysis (31) on the qualitative data. For research question 1, we coded the  
306 respondents' opinions on the performance of the PCPs and their teams into good, average  
307 or poor performance regarding the following dimensions: technical effectiveness, patient-  
308 centeredness, accessibility, continuity of care, community-engagement, PCP's capacity to  
309 strengthen the primary care team and facility, and the case's contribution to strengthen the  
310 local health system. We then summarized the performance of each PCPs along each of  
311 these dimensions into good, average or poor performance, based on the majority of  
312 opinions. Finally, we integrated quantitative and qualitative results in a table presenting an  
313 overall view of the cases' performance.

314

### 315 [Research questions 2 and 3](#)

316 We developed a coding tree, based on the factors indicated in our conceptual framework  
317 and on the basis of our field notes. This coding tree was iteratively refined, and new codes  
318 were progressively added during the data coding process. The codes were then regrouped  
319 into themes, based on semantic similarities and co-occurrence.

320

321 More specifically for research question 2, we identified the factors that were most cited  
322 across the 8 cases and across stakeholder' groups as important in shaping PCPs'  
323 performance. We then summarized these factors in a table and provided examples of  
324 positive and negative influencing factors, as indicated by our respondents.

325

326 For research question 3, we performed a cross-case analysis. This method facilitates  
327 comparison of commonalities and differences in events, activities, and processes within the  
328 various case studies (33). For the cross-case analysis in our study, we displayed in a matrix  
329 all the cases and the main themes representing potential performance factors. We then  
330 described in more depth the key aspects of each theme and discussed how this relates to  
331 the case's performance. Finally, we summarized the similarities and the common elements  
332 throughout the cases in relation to each theme and concluded on whether or not a  
333 particular theme would be a factor influencing PCP's performance.

334

335 In this paper, we present a summary of the most important potential performance factors.  
336 The matrix used for the cross-case analysis and the data within it, are presented in  
337 supplementary file 2.

338

339

340 **Ethics**

341 This study received the ethical approvals of the Institutional Review Board of the Institute of  
342 Tropical Medicine of Antwerp in Belgium (N° 1545/21) and the ethics committee for  
343 biomedical research of the University of Parakou in Benin (N°0513/CLREB-UP/P/SP/R/SA).  
344 We obtained informed consent from all participants, and the data were treated with strict  
345 confidentiality.

346

347 **Results**

348 **Performance of the 8 PCP cases in Benin.**

349 Figure 3 displays the mean communication scores and the mean percentage of  
350 recommended clinical actions performed for each of the PCPs' observed.

351

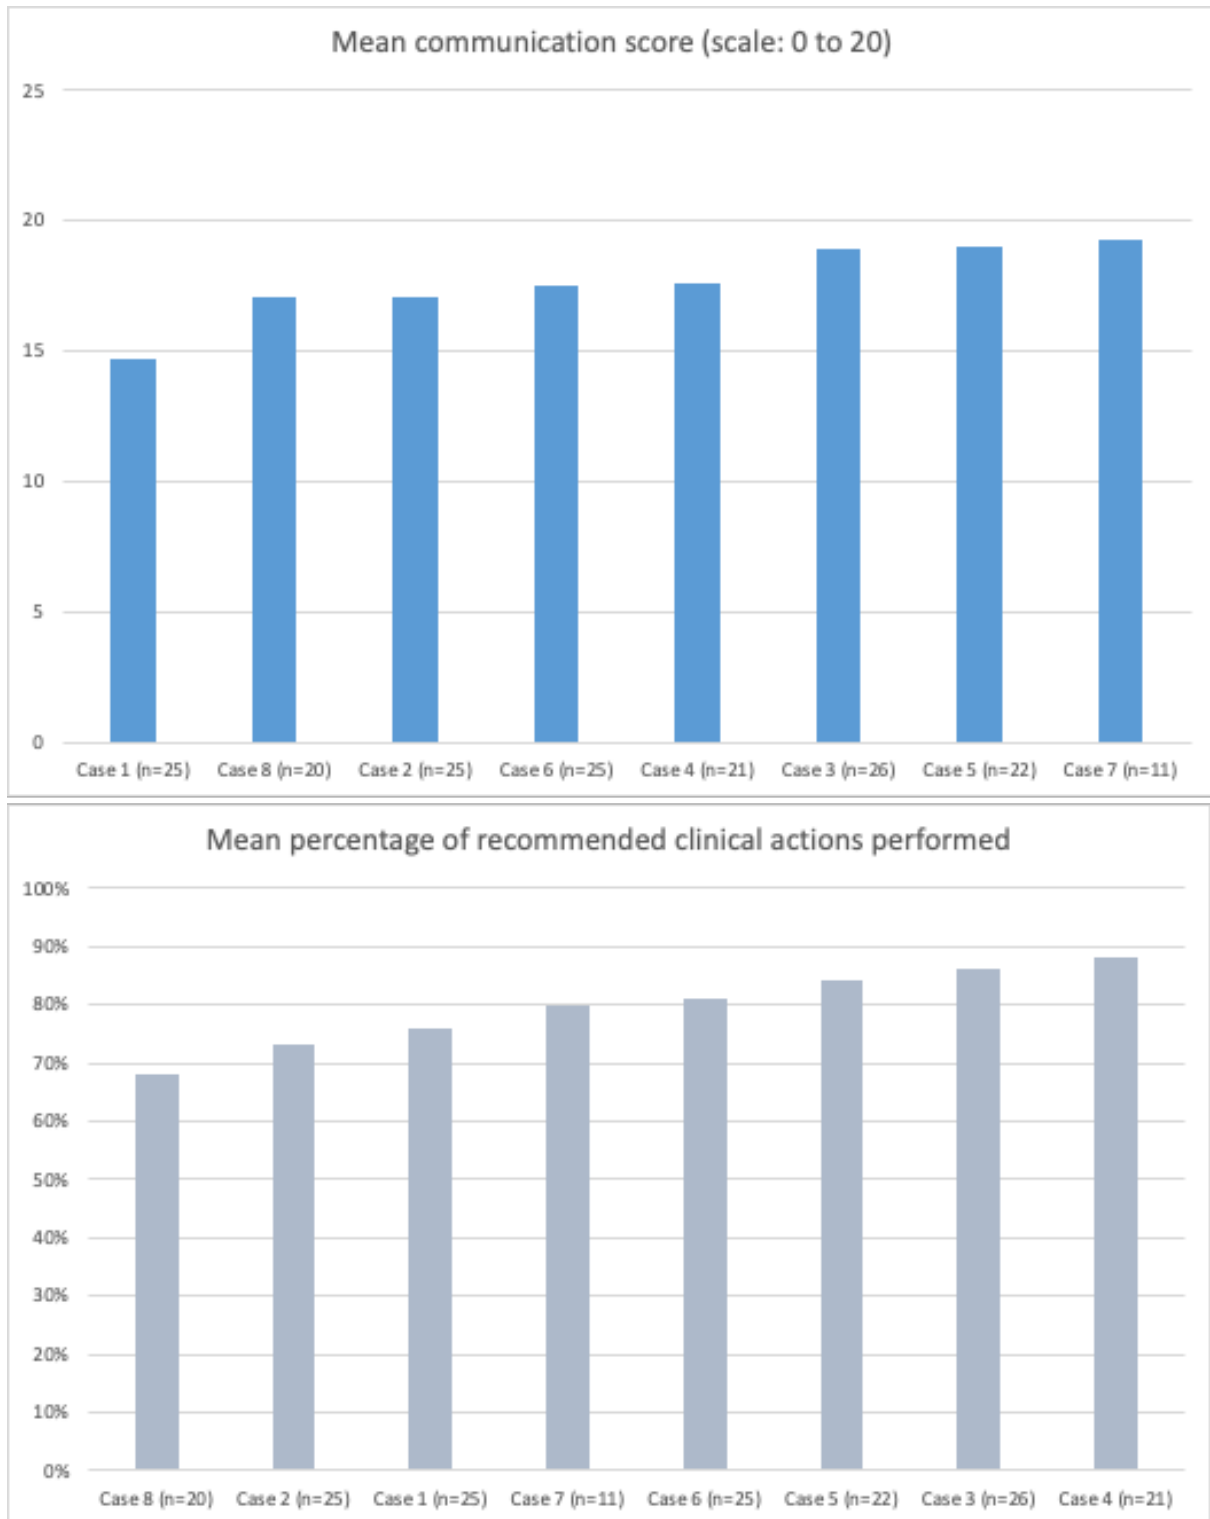

352  
353

Figure 3: Mean quality scores of the consultations observed for each PCP case

354 Table 3 below summarizes the performance of the 8 PCP's practices, based on the  
 355 qualitative analysis (stakeholders' perceptions and observation of the research team).

356

357 *Table 3: Performance of the cases, based on the qualitative analysis*

| Performance dimensions                                              | Case 1  | Case 2  | Case 3  | Case 4  | Case 5  | Case 6  | Case 7  | Case 8  |
|---------------------------------------------------------------------|---------|---------|---------|---------|---------|---------|---------|---------|
| Technical effectiveness                                             | Average | Poor    | Good    | Average | Good    | Average | Average | Average |
| Patient-centeredness (PCC)                                          | Average | Average | Average | Good    | Good    | Good    | Good    | Average |
| Accessibility                                                       | Average | Average | Average | Average | Average | Average | Good    | Poor    |
| Continuity                                                          | Average | Average | Average | Average | Good    | Good    | Good    | Average |
| Community-engagement                                                | Average | Poor    | Good    | Good    | Average | Good    | Good    | Good    |
| PCP's capacity to strengthen the primary care team and the facility | Poor    | Poor    | Average | Good    | Good    | Good    | Good    | Average |
| Case's contribution to strengthen the local health system           | Average | Average | Good    | Good    | Average | Good    | Good    | Good    |

358

359 From the quantitative and qualitative results above, cases 1 and 2 have the weakest  
 360 performance for all dimensions assessed. They had the lowest communication scores (14.69  
 361 and 17.08 respectively) and the lowest percentages of recommended clinical actions (68%  
 362 and 73% respectively). Similarly, based on stakeholders' perceptions and observations, the  
 363 performance of these two cases was systematically poor or average throughout all  
 364 dimensions.

365

366 The other six cases were more difficult to categorize. When we look at the individual  
 367 performance for technical effectiveness and patient centered care, assessed through the  
 368 consultations' observations, case 8 had low scores. However, the qualitative data indicated  
 369 that it performed well in terms of community engagement and contribution to strengthen  
 370 the local health system. Cases 3 and 5 appear to be the best performing cases when we  
 371 consider individual performance during observations. Indeed, even if they did not have the  
 372 best score for any of the two indicators, they both had high scores for both (see figure 3).  
 373 The qualitative data also confirmed this finding. However, when we integrate the other  
 374 dimensions and the performance of the primary care team as a whole, the performance of  
 375 cases 3 and 5 are rather average. For instance, patient centeredness of care provided in case  
 376 3 is average because of poor welcoming and communication with patients by the primary  
 377 care team (apart from the PCP). Moreover, the accessibility of the PCP is limited because the  
 378 PCP is regularly absent. As for case 5, its accessibility is limited because of high costs of care.  
 379 There is also lack of a genuine community engagement beyond top-down designed  
 380 sensitization campaigns. The contribution of this case to strengthen the local health system  
 381 is difficult to appreciate because of the absence of a clearly defined population of  
 382 responsibility and limited coordination with other health system actors.

383 Case 6 had an average performance for both indicators (17.47 for the communication scores  
384 and 81% for the percentage of recommended clinical actions). The best performing case for  
385 communication was case 7 (score of 19.28) but it was only average for the other indicator  
386 (80%). Similarly, the best performing case in terms of complying with recommended clinical  
387 actions was case 4 (88%) but it was only average for the other quantitative indicator (score  
388 of 17,63). However, the qualitative data revealed that cases 6 and 7 performed better in  
389 more dimensions than the other cases.

390

#### 391 **Factors perceived by various stakeholders as key-influencers of PCPs' performance.**

392 The factors that were most frequently mentioned by the stakeholders were related (in  
393 descending frequency order) to: (i) equipment, infrastructure, and utilities; (ii) support of the  
394 primary care team; (iii) PCPs' intrinsic motivation and values; (iv) PCPs' knowledge and  
395 competencies; (v) fulfilment of the PCP' personal needs; (vi) support from health authorities,  
396 peers, local government authorities and/or community members; (vii) workload that PCPs  
397 face; (viii) general context elements of the locality where the PCPs' practice is situated; and  
398 finally (ix) financial resources available. Table 3 provides illustrations on how these factors  
399 influence the PCPs' practices, as reported by the stakeholders.

400



401 *Table 4: Factors perceived by the stakeholders as influencing the PCPs' performance*

| Factors perceived as influencing the PCPs' performance                                      | Views related to positive influence                                                                                                                                                                                                                                                                                     | Views related to negative influence                                                                                                                                                                                                                                                                                                                                                                                                              |
|---------------------------------------------------------------------------------------------|-------------------------------------------------------------------------------------------------------------------------------------------------------------------------------------------------------------------------------------------------------------------------------------------------------------------------|--------------------------------------------------------------------------------------------------------------------------------------------------------------------------------------------------------------------------------------------------------------------------------------------------------------------------------------------------------------------------------------------------------------------------------------------------|
| Equipment and infrastructures                                                               | <ul style="list-style-type: none"> <li>Availability of the required equipment (for instance basic lab tests) helps the PCPs to have more accurate diagnosis</li> </ul>                                                                                                                                                  | <ul style="list-style-type: none"> <li>Low access to telephone and internet hampers the PCPs' access to adequate information and can decrease their motivation</li> <li>Even if a PCP knows the required treatment for a complex condition, poor equipment may prevent her to apply it.</li> </ul>                                                                                                                                               |
| Support of effective and available primary care team                                        | <ul style="list-style-type: none"> <li>Good collaboration with the primary care team facilitates the PCP's work and fosters learning.</li> <li>Task sharing reduces the PCP's workload.</li> </ul>                                                                                                                      | <ul style="list-style-type: none"> <li>Sometimes there are tensions between the PCPs and the nurse-partitioners (especially the one who were leading the centers before the PCP arrives). This hampers the results.</li> </ul>                                                                                                                                                                                                                   |
| Intrinsic motivation and appropriate values                                                 | <ul style="list-style-type: none"> <li>PCPs who perform well or improve overtime were deemed to show a set of attributes and values, such as willingness to perform well and to learn, open-mindedness, respect for the patients and their cultures, commitment to the community and trustful relationships.</li> </ul> | <ul style="list-style-type: none"> <li>According to stakeholders, some PCPs fail to perform community-oriented care or to support the primary care team members because of a poor integration into the community and little proactivity.</li> </ul>                                                                                                                                                                                              |
| PCP's knowledge and competencies                                                            | <ul style="list-style-type: none"> <li>Good academic training and good medical knowledge were cited as factors having a positive influence on PCPs' performance.</li> </ul>                                                                                                                                             | <ul style="list-style-type: none"> <li>Lack of continuing education, lack of protocols for the management of conditions encountered by the PCPs were cited barriers for the PCPs' performance.</li> </ul>                                                                                                                                                                                                                                        |
| Fulfilment of the PCP's personal needs                                                      | <ul style="list-style-type: none"> <li>Availability of housing and necessary amenities were cited as elements that supports the PCPs' motivation to work well, to be available and remain at primary care level (especially in underserved areas).</li> </ul>                                                           | <ul style="list-style-type: none"> <li>Inadequate salary and poor PCPs' satisfaction were cited as factors decreasing the PCPs' performance to perform well.</li> </ul>                                                                                                                                                                                                                                                                          |
| Support from the health authorities, the peers, the local authorities, and/or the community | <ul style="list-style-type: none"> <li>Support from the district medical team help PCPs to get access to resources such as training for themselves or their team, or key information.</li> </ul>                                                                                                                        | <ul style="list-style-type: none"> <li>Lack of support from local authorities can make administrative procedures or access to information difficult for the PCPs and their facilities, especially in the private sector.</li> <li>The little functionality of the rare physicians' professional associations and little support by stakeholders in general were cited as demotivating factors and unfavorable for a good performance.</li> </ul> |
| High PCPs' workload                                                                         | <ul style="list-style-type: none"> <li>No positive example provided</li> </ul>                                                                                                                                                                                                                                          | <ul style="list-style-type: none"> <li>Insufficient human resources in the PCPs facility and high workload (especially for the PCPs in the public sector) may provide little</li> </ul>                                                                                                                                                                                                                                                          |

|                             |                                                                                |                                                                                                                                                                                                                                                                                                                                                                     |
|-----------------------------|--------------------------------------------------------------------------------|---------------------------------------------------------------------------------------------------------------------------------------------------------------------------------------------------------------------------------------------------------------------------------------------------------------------------------------------------------------------|
|                             |                                                                                | time to the PCPs to do their work properly and to learn.                                                                                                                                                                                                                                                                                                            |
| General context/environment | <ul style="list-style-type: none"> <li>No positive example provided</li> </ul> | <ul style="list-style-type: none"> <li>Many contextual factors can hamper the PCPs' performance such as the low financial capacity of the patients to pay for the necessary health commodities or the unfair competition from illegal practitioners which can push some PCPs to lower the quality of care, the lack of basic commodities in rural areas.</li> </ul> |
| Financial resources         | <ul style="list-style-type: none"> <li>No positive example provided</li> </ul> | <ul style="list-style-type: none"> <li>Insufficient financial resources in the PCPs' facilities may negatively affect their work</li> </ul>                                                                                                                                                                                                                         |

402 **Factors highlighted by the cross-case analysis as likely to contribute to PCPs providing**  
 403 **quality primary healthcare in Benin**

404 Based on the stakeholders' perceptions reported above, our conceptual framework and field  
 405 observations, we identified a set of factors that can potentially influence the performance of  
 406 the PCPs' practices. We have then conducted an analysis across the 8 cases to explore how  
 407 each of these factors played out for each case and what could be the link between these  
 408 factors and the case's performance. We concluded that a given factor probably influences a  
 409 particular dimension of PCPs' performance when the following conditions were met:

- 410 - the factor is present for PCPs who display good performance and absent for the PCPs  
 411 who display poor performance for a given dimension.
- 412 - There is a logical explanation on how the factor influences the PCPs' performance.

413  
 414 Based on this analysis, we concluded that the following factors are likely to influence the  
 415 performance of the PCPs' practices included in our study: (i) the set of values underpinning  
 416 the PCPs' practices; (ii) the PCPs' preparation to practice at the level of the first line; (iii) the  
 417 support provided to the PCPs by the hierarchy, peers or professional associations; (iv) the  
 418 leadership mandate given to the PCPs and the degree of autonomy allocated to exert it; (v)  
 419 the modalities of financing of the PCPs' practices; (vi) the accountability mechanisms in place  
 420 to support PCPs' practices; (vii) the extent of collaboration with community leaders and  
 421 other key stakeholders; (viii) the PCPs' relationship with the rest of the primary care team  
 422 and their leadership style; and (ix) the context in which the PCPs' practices are embedded,  
 423 especially whether this practice is in urban and rural area, and the ownership of the practice  
 424 by the State or not.

425  
 426 As illustration of this finding, the cases 1 and 2 were the least performing cases in our  
 427 sample. In these cases, the PCPs had had little preparation to practice at the level of the first  
 428 line, the mandate and roles assigned to them were limited to patients' consultations, and  
 429 they had a limited autonomy for influencing anything in their health facilities. They did not  
 430 have any incentive or requirement to go into the community and they work in silo or in  
 431 minimum collaboration rather than in team with the other primary care team members  
 432 (especially the case 2). In contrary, in the cases 6 and 7, which performed better than others

433 in several dimensions, the PCPs were very well prepared through a short post-graduate  
434 training and field coaching. As the owners of their health facilities, they had a leadership  
435 mandate and the necessary autonomy to exert this mandate. They also signed a charter with  
436 their professional association, the health authorities, and the local authorities through which  
437 they pledged to serve a well-defined population and they work together with the local  
438 stakeholders. In these cases 6 and 7, the PCPs lead the primary care teams but they exert a  
439 person-centered leadership with a good collaboration with the other primary care team  
440 members and a particular attention to the needs of these team members.

441  
442 Regarding the values, we found in all cases a commitment to serve the community and a  
443 degree of professionalism. However, differences were found across the cases for other  
444 values, and this impacts their performance. For example, in the sites where altruism and  
445 commitment to help people were more developed (cases 1, 6 and 7), the financial  
446 accessibility was better. In contrary, sites where these values were lacking (case 5) or only  
447 officially stated (cases 2, 3,4, and 8), the financial accessibility was either average or bad.  
448 Similar patterns were found for the support provided to the PCPs, the modalities of the  
449 financing of the PCPs' practices, the accountability mechanisms, and the context.

450  
451 Even though equipment and infrastructure are the most often mentioned factors by all types  
452 of stakeholders, we could not find enough evidence to conclude that these influence the  
453 performance of the cases studied. Neither could we conclude that continuing education and  
454 fulfilment of the PCP's personal needs would influence the performance of the PCP. We did  
455 not analyze the impact of the overall health regulation on the PCPs' practices because this  
456 regulation is the same from one case to another and it was not possible to find differences  
457 among the cases.

458 The table below summarizes our key findings. A detailed analysis of the factors influencing  
459 the PCPs' practices across the 8 cases is available in the supplementary file 3.

| Corresponding aspect of the conceptual framework | Observed factors                                      | Summary of the analysis                                                                                                                                                                                                                                                                                                                                                                                                                                                                                                                                                                                                                                                                                                                                                                                                                                                                                    |
|--------------------------------------------------|-------------------------------------------------------|------------------------------------------------------------------------------------------------------------------------------------------------------------------------------------------------------------------------------------------------------------------------------------------------------------------------------------------------------------------------------------------------------------------------------------------------------------------------------------------------------------------------------------------------------------------------------------------------------------------------------------------------------------------------------------------------------------------------------------------------------------------------------------------------------------------------------------------------------------------------------------------------------------|
| Professional identity                            | Values                                                | <ul style="list-style-type: none"> <li>• The values that guide the PCPs' practices influence the outcomes of these practices.</li> <li>• The nature of the values determine which performance dimension is influenced and whether this influence is positive or negative. For example: <ul style="list-style-type: none"> <li>- Altruism and commitment to help people positively influences financial accessibility of the services provided.</li> <li>- Hierarchical culture negatively impacts the PCPs' capacity to strengthen the primary care team.</li> </ul> </li> <li>• Some good official values (for instance the public service orientation in the public health facilities) are not supported by the incentives and job descriptions provided to the PCPs.</li> </ul>                                                                                                                         |
| Governance                                       | Preparation of the PCP to practice at the first- line | <ul style="list-style-type: none"> <li>• PCPs that were prepared (i.e. empowered in terms of knowledge and skills, psychological preparation to work in resources constraint environments, preparation for the specificities of the primary care practices) to fulfill their roles at the first line tend to perform better in the area in which they were capacitated.</li> <li>• From the examples in our study, this preparation can occur during the undergraduate training in some medical schools, during a postgraduate training, or on-the-job through coaching at the start of the employment.</li> <li>• The aspects in which the PCPs are capacitated determine the dimensions in which they will be performant. For example, one of our cases was mainly performant in the technical quality and facility management, these were the dimensions in which he was very well prepared.</li> </ul> |
| Governance                                       | Continuing education                                  | <ul style="list-style-type: none"> <li>• There is a general lack of continuing education among the cases studied.</li> <li>• Our findings do not support a relation between continuing education and performance of the PCPs.</li> </ul>                                                                                                                                                                                                                                                                                                                                                                                                                                                                                                                                                                                                                                                                   |
| Governance                                       | Equipment and infrastructure                          | <ul style="list-style-type: none"> <li>• There is generally poor equipment and infrastructure in the sites studied but our findings do not support equipment as a factor determining the PCPs performance.</li> <li>• Our findings do not support the fact that equipment and infrastructure impact the performance of the PCPs' practices.</li> </ul>                                                                                                                                                                                                                                                                                                                                                                                                                                                                                                                                                     |
| Governance                                       | Support from the hierarchy, peers or associations     | <ul style="list-style-type: none"> <li>• Having a support positively influences the performance of the PCPs who benefited from it. The support influences the PCPs' performance through clarification of what is expected from the PCPs, access to resources, peer-learning, coaching or feedback, and psychological support.</li> <li>• The support can come from the PCPs' hierarchical superior or from peers.</li> <li>• The performance dimension influenced by the support provided to the PCPs depends on the type of support provided (thus the support should be tailored to what is expected from the PCPs).</li> </ul>                                                                                                                                                                                                                                                                          |
| Governance                                       | The leadership mandate given to the PCP and the       | <ul style="list-style-type: none"> <li>• The PCPs who have the mandate to lead their health center or primary care team took actions to strengthen this team and to improve their health facility.</li> </ul>                                                                                                                                                                                                                                                                                                                                                                                                                                                                                                                                                                                                                                                                                              |

|                      |                                                                 |                                                                                                                                                                                                                                                                                                                                                                                                                                                                                                                                                                                                                                                                                                                                                                                                                                                                                                                                                                                                                                                                                                                                                                                       |
|----------------------|-----------------------------------------------------------------|---------------------------------------------------------------------------------------------------------------------------------------------------------------------------------------------------------------------------------------------------------------------------------------------------------------------------------------------------------------------------------------------------------------------------------------------------------------------------------------------------------------------------------------------------------------------------------------------------------------------------------------------------------------------------------------------------------------------------------------------------------------------------------------------------------------------------------------------------------------------------------------------------------------------------------------------------------------------------------------------------------------------------------------------------------------------------------------------------------------------------------------------------------------------------------------|
|                      | degree of autonomy allocated to exert it                        | <ul style="list-style-type: none"> <li>• However, our findings suggested that the leadership mandate has a greater chance to support the PCPs' performance when it is associated with a certain degree of autonomy.</li> </ul>                                                                                                                                                                                                                                                                                                                                                                                                                                                                                                                                                                                                                                                                                                                                                                                                                                                                                                                                                        |
| Governance           | Modalities of the financing of the PCPs' practices              | <ul style="list-style-type: none"> <li>• The reliance on the income generated by the health services reduces the financial accessibility in some cases because the PCPs' practices needed to increase their costs to ensure their financial viability. This also led to over-prescription in other cases, thus reducing the quality of care.</li> <li>• The existence of a financial support by a third party (NGO or church for instance) helps to maintain the costs low, thus improving financial accessibility.</li> <li>• Some strategies may help the PCPs' practices to mitigate the financial burden of the PCPs' practices: the use of generic medicines, targeting a high number of consultations instead of a high price for one consultation, reducing the open hours, and a good accounting system supported by a professional accountant.</li> <li>• The financing modalities can improve the PCPs' accountability and performance. For example, relying on the income generated by the health services may improve the technical quality of care and the patient centeredness, if the patients have the possibilities to choose other health practitioners.</li> </ul> |
| Governance           | Fulfillment of the PCP's personal needs                         | <ul style="list-style-type: none"> <li>• The fulfillment of the PCPs' personal needs appeared to increase the motivation and retention in the workplace for some PCPs. However, other could achieve good performance in various dimensions even with only an average satisfaction related to their personal needs.</li> <li>• We did not have enough evidence to conclude that it improves their performance.</li> </ul>                                                                                                                                                                                                                                                                                                                                                                                                                                                                                                                                                                                                                                                                                                                                                              |
| Governance           | Regulation of the PCPs' practices                               | <ul style="list-style-type: none"> <li>• In Benin, there are rules and laws that exist for regulating the practices of physicians and health workers in general (medical code of ethics, decrees regulating the private practice of health professionals, law for the people's health protection in Benin, etc.)</li> <li>• We did not analyze this factor because the regulation does not differ from one case to another. Therefore, we would not be able to find differences among the cases.</li> </ul>                                                                                                                                                                                                                                                                                                                                                                                                                                                                                                                                                                                                                                                                           |
| Governance           | Accountability mechanisms                                       | <ul style="list-style-type: none"> <li>• Effective accountability mechanisms (including the clear definition of the PCPs' roles, the clear definition of the deliverables or indicators expected from them and an effective way to assess these deliverables or indicators) positively influence the performance of PCPs' practices.</li> <li>• The dimensions of performance influenced by the accountability mechanisms depend on the expectations set for the PCPs and the possibility to properly assess (or measure) the attainment of these expectations.</li> <li>• Patients and community members' capacity to hold the primary care teams accountable can positively influence the performance of the PCPs' practices. This capacity comes either from their financial capability or from the strength of the community leaders.</li> </ul>                                                                                                                                                                                                                                                                                                                                  |
| Roles and activities | Collaboration with community leaders and other public officials | <ul style="list-style-type: none"> <li>• PCPs' practices where we found an active collaboration with community leaders and other key stakeholders are more likely to have a better community engagement and a better contribution to strengthen the local health system.</li> <li>• Collaboration with community leaders and other key stakeholders can also help the PCPs' practices to have access to some resources and feedback on their performance.</li> </ul>                                                                                                                                                                                                                                                                                                                                                                                                                                                                                                                                                                                                                                                                                                                  |

|                      |                                                                                      |                                                                                                                                                                                                                                                                                                                                                                                                                                                                                                                                                                                                                                                                                                                                                                                                                                                                                                                                                                                                                                                                                                                                                                                                                                                                                                                                                                              |
|----------------------|--------------------------------------------------------------------------------------|------------------------------------------------------------------------------------------------------------------------------------------------------------------------------------------------------------------------------------------------------------------------------------------------------------------------------------------------------------------------------------------------------------------------------------------------------------------------------------------------------------------------------------------------------------------------------------------------------------------------------------------------------------------------------------------------------------------------------------------------------------------------------------------------------------------------------------------------------------------------------------------------------------------------------------------------------------------------------------------------------------------------------------------------------------------------------------------------------------------------------------------------------------------------------------------------------------------------------------------------------------------------------------------------------------------------------------------------------------------------------|
| Roles and activities | Relationship with the rest of the primary care team and leadership style of the PCPs | <ul style="list-style-type: none"> <li>• A strong collaboration between the PCPs and the rest of the primary care team associated with a person-centred leadership style from the PCPs positively influences the PCPs' performance, especially for the PCPs' capacity to strengthen the primary care team.</li> <li>• This positive influence is achieved through a better teamwork, knowledge sharing, and development of shared values.</li> <li>• A hierarchical relationship and a command-and-control style of leadership and a relationship where the PCP and the rest of the primary care team members work in silo appear to not support a good performance.</li> <li>• A hierarchical relationship and a command-and-control style of leadership may support a good performance of PCPs' practice, but only if the PCP has a control over the hiring of the primary care team members.</li> <li>• Allowing nurse-practitioners to provide patient care contributes to increase the accessibility of care for the population. This is achieved in two ways: the nurses can compensate for the absence of the physicians, and having nurses that consult reduces the number of physicians necessary, thus the cost for the facilities and the patients.</li> </ul>                                                                                                    |
| Roles and activities | Workload                                                                             | <ul style="list-style-type: none"> <li>• Difficult to appreciate a possible impact of the number of patients on the PCPs' performance, as the average numbers of patients seen daily was relatively low, ranging from 4 to 10.</li> <li>• Even in case of limited availability due to non-clinical tasks (especially for the PCPs in the public sector), this was compensated by the nurse practitioners. Therefore, it was also difficult to appreciate the impact of multiple non-clinical activities on the PCPs' performance.</li> </ul>                                                                                                                                                                                                                                                                                                                                                                                                                                                                                                                                                                                                                                                                                                                                                                                                                                 |
| Not directly related | Context in which the PCPs' practices are embedded                                    | <ul style="list-style-type: none"> <li>• Several contextual aspects were found: insufficient financial capacities within the communities, urbanization level, ownership of the facility, and recurrent health systems issues such as a weak referral system or medicine stockout at national level.</li> <li>• In our study the contextual factors that influence the PCPs' performance are: <ul style="list-style-type: none"> <li>- the urbanization level: some conditions appear easier to find in rural area than in urban area, such as a good relationship with the community leaders or a family-like relationship between the PCP and the rest of the care team. Lab tests, branded medicines and private health insurances were more available for the cases located in urban areas. This increases the availability of services but also provides more incentives for over prescription, as saw for some cases. Moreover, the competition with other centers tends to be higher in urban area, which led some of the cases to propose more and more diagnosis tests and sophisticated equipment to outdo other facilities.</li> <li>- the ownership of the facility: in facilities owned by the State, the degree of autonomy of the PCPs and ability to make some decisions is lower than in the facilities owned by the PCPs themselves.</li> </ul> </li> </ul> |

## 461 **Discussion**

### 462 **Main results and comparison with international literature**

#### 463 *Assessing the performance of the PCPs*

464 In this study, we used seven dimensions to evaluate the PCPs' performance: technical  
465 effectiveness, patient-centeredness, accessibility of the PCPs' services, continuity of care,  
466 community-engagement, the PCP's capacity to strengthen the primary care team and the  
467 facility, and the contribution of the PCPs' practices to strengthen the local health system.  
468 This holistic view of the PCPs' performance makes the evaluation complex, and simpler  
469 approaches could be advocated for routine monitoring. However, our holistic approach  
470 enabled us to get an in-depth understanding of the PCPs' performance and to identify issues  
471 that might not be uncovered with the analysis of only one dimension. For instance, in our  
472 study, the two cases performing best for technical effectiveness performed averagely for  
473 other dimensions, which impeded the overall quality of the care received by the patients.  
474 Measuring health workers' performance in primary care systems should thus include various  
475 dimensions, reflecting the final outcomes expected from these systems. This  
476 multidimensional assessment is a strong recommendation of the PHC measurement  
477 framework published by WHO in 2020 (27) and other works (34,35). Unfortunately, many  
478 studies on health workers' performance assessed one or very few dimensions, usually the  
479 technical effectiveness for specific health conditions (36–38).

480  
481 Another important fact is that the PCPs' performance can hardly be disentangled from that  
482 of their team and the health facility in general. This is particularly true in contexts like Benin  
483 and many other African countries where the PCPs usually work together or along with  
484 nurses-practitioners. The case study approach we used allowed us to analyze the PCPs'  
485 performance within their context and understand how this performance relates to the  
486 performance of the rest of the healthcare team and to the patients' experiences. For  
487 example, we found that some PCPs might have an excellent individual performance, but the  
488 overall performance of their practices (which includes their own performance the one of  
489 their team) was rather average. In other cases, individual average performance of the PCPs  
490 was compensated by a good performance of the primary care team, resulting in good  
491 patients' experience and good contribution to strengthening the primary care team. Our  
492 approach to study the PCPs' performance aligns with the recommendations in the literature,  
493 according to which one should not only focus on measuring and improving the performance  
494 of individual health workers, but also consider team and organizational factors (21,34,38).

495

#### 496 *Factors influencing the PCPs' performance*

497 Nine factors emerged from this multiple-cases study as likely to influence the PCPs'  
498 performance in Benin:

- 499 - One factor is related to the professional identity of the PCPs': the values supporting  
500 the PCPs' practices.

- 501 - Five are related to the governance of the PCPs' practices: the PCPs' preparation to
- 502 practice at the first- line, the support provided to the PCPs from the hierarchy, peers
- 503 or professional associations, the leadership mandate given to the PCPs and the
- 504 degree of autonomy allocated to exert it, the modalities of the financing of the PCPs'
- 505 practices, and the accountability mechanisms in place to support the PCPs' practices.
- 506 - Two are related to the roles and activities of the PCPs: the PCPs' relationship with the
- 507 rest of the primary care team and their leadership style and the PCPs' collaboration
- 508 with community leaders and other public officials.
- 509 - One transversal factor: the context in which the PCP's practices are embedded.

510

511 For the values, both the analysis of the stakeholders' perceptions and the cross-case analysis  
512 showed that they influence various performance dimensions. Professional values are indeed  
513 cornerstones of the identity of any profession (39), and they are reported to be important  
514 for health workers' performance (39). However, as clearly illustrated among some of the  
515 cases included in our study (table 5) and other studies (40), professional values should not  
516 be taken for granted and it is not enough to articulate them in official documents. It is  
517 important to ensure that the PCPs and other primary care workers adopt the values that  
518 would support the performance expected from them. The few existing postgraduate training  
519 programs for PCPs in sub-Saharan Africa (41,42) and some undergraduate programs (43)  
520 include socialization of the trainees for the core PHC and family medicine values, such as  
521 social justice, people-centeredness, community-orientation, etc. However, our study shows  
522 that values can also be shared through interactions with peers within professional  
523 associations or coaching from supervisors. This provides opportunities for PCPs already  
524 working and countries without a postgraduate training program yet.

525

526 As for the PCPs' preparation, providing to the PCPs the necessary knowledge and skills to  
527 practice in primary care settings was among the top five factors cited by the stakeholders we  
528 interviewed. Scholars also pinpointed the physicians' knowledges and skills as a key factor  
529 determining their performance (34,43). However, knowledge and skills should help the PCPs  
530 to achieve the core primary care functions (27) and be geared towards the people's needs at  
531 primary care level (as opposed to a hospital setting) (44). Other aspects of the PCPs'  
532 preparation include preparing them psychologically to work in resource constrained  
533 environments and improving their soft skills (leadership and communication skills for  
534 example) to embrace the various roles expected from them, to work within a team and to  
535 deal with the community leaders (5,34,45). Our study showed that the PCPs who got such  
536 preparation tend to perform better. Alike the values, this preparation can be provided  
537 through various channels including undergraduate training, postgraduate training, or  
538 coaching by professional associations or supervisors.

539

540 Another factor highlighted by the stakeholders' interviews and the cross-case analysis is the  
541 support received by the PCPs. This support helped the PCPs to have a better understanding



542 of the roles expected from them, to have access to some necessary resources, to get  
543 feedback on their performance and to have a psychological resilience in difficult situations.  
544 This in turn improved their performance. PCPs received support either from the hierarchy, or  
545 their peers or professional associations. Studies in both hospital and primary care settings  
546 reported that support from the health facility managers helps to implement best-  
547 practices(38), motivates the health workers for good performance (34,35), and facilitates  
548 access to necessary resources to provide care of good quality (38). Peer support is also  
549 reported in the literature as a powerful means to enhance health workers' performance  
550 (46).

551  
552 Regarding the leadership mandate, the PCPs in our sample who were given this mandate  
553 make visible efforts to improve the quality of care and the availability of resources in their  
554 health facilities. We also found that among PCPs with a leadership mandate, those with the  
555 necessary autonomy were more able to take the necessary decisions and hold the primary  
556 care team accountable for a good performance. Leadership is a key function in health system  
557 (27,47). In a primary care team this function can be fulfilled by any cadre. However, in the  
558 African context, many stakeholders see the PCP as the leader of the primary care  
559 team(5,45,48), and our study confirmed this. Consequently, giving the PCPs the official  
560 mandate and skills to effectively exert this leadership mandate appears important.

561  
562 Moreover, ensuring autonomy over resource utilization and daily management at the first  
563 line facility is shown to improve performance because managers can be more responsive to  
564 local needs and react better to daily issues (34).

565  
566 Concerning the financing modalities of the PCPs' practices, the cross-case analysis showed  
567 lack of financial support is likely to lead to increased costs for the patients and poor quality.  
568 Providing financial support to the PCPs' practices can thus contribute to improve their  
569 performance (and their financial sustainability) (49). For instance, we found in this study, as  
570 in other work (34,35), that the opportunity to receive funding (or risk to lose it) was an  
571 incentive to be more responsive to the patients. However, this financial support (and the  
572 PCPs' payment mechanisms) must be carefully designed and geared towards the results  
573 expected from the PCPs (34,50). It should avoid the issues related to financial incentives by  
574 integrating a mix of provider payment mechanisms (50) and being combined with other  
575 types of incentives. We also found that professional financial management can help the PCPs  
576 to mitigate their costs and enhance their financial sustainability. This professional facility  
577 management (different from the leadership) is also recommended by the WHO (27) and  
578 does not need to be done by the PCPs themselves.

579  
580 The accountability mechanisms in place to support the PCPs' practices strongly appeared in  
581 the cross-case analysis as influencing the PCPs' practices. Effective accountability  
582 mechanisms include a clear definition of the PCPs' roles (this was for example the case for

583 the PCPs in the public sector in our sample), a clear definition of the results expected  
584 (including the population for which they are accountable), effective ways to assess and share  
585 these results and clear consequences when these results are achieved or not. The literature  
586 largely reports the need for the PCPs and the primary care teams in general to be  
587 accountable (34,35,45). Our study also highlighted that accountability mechanisms can exist  
588 and be enforced but not support the right results. For instance, the PCPs in the public sector  
589 in our sample were held accountable for the income generated by their health facility, but  
590 this does not necessarily support the core functions of primary care. Therefore, the  
591 accountability mechanisms for PCPs in Africa should be built around the end results  
592 expected from African primary care systems (34,51).

593  
594 The PCPs' relationship with the rest of the primary care team (mentioned by the  
595 stakeholders as the support of effective and available primary care team) is another  
596 performance factor found by this study. Like in other research (27,38,50,52), we found that  
597 the PCPs are likely to perform better if they work in cohesion with other primary care  
598 professionals (especially nurse-practitioners). When such cohesion exists (rather than  
599 working in silos or within hierarchical relationships), there are better chances for the primary  
600 care team to have shared values, to share knowledge and to work together towards a shared  
601 objective (38). Moreover, in the cases where there is a teamwork, we found that the non-  
602 physicians were able to provide good quality of care to the patients, with the support of the  
603 PCP, even when the latter is not present. This teamwork requires a leadership style from the  
604 PCP that is person-centered and favors the development of shared objectives, understanding  
605 and motivating team members, and building a team spirit (35,45).

606  
607 The collaboration with community leaders and other public officials appeared in the cross-  
608 case analysis and stakeholders' interviews as a factor that supports the PCPs' performance in  
609 terms of community orientation and contribution to a good local health system. Indeed,  
610 when such collaboration exists, the community leaders usually help the PCPs to understand  
611 the needs of the communities they serve and to build the necessary trust for the use of the  
612 health services by these communities. We also found some cases where the community  
613 leaders helped the PCPs to access financial or material resources or provided feedback on  
614 their practices, thus contributing to the overall performance of these PCPs. Engaging with  
615 local stakeholders to understand key issues, design and implement solutions for these issues  
616 has long been proven to be as an essential factor for improving performance and ensuring  
617 the success of health interventions (27,35). However, this factor is more commonly cited  
618 when referring to health for health system governance or facility management (27,35). Our  
619 study shows that engaging key stakeholders in the community is also important for the  
620 delivery of good quality primary care services and the performance of the primary care  
621 teams.

622

623 The last factor emphasized by both the cross-case analysis and the stakeholders' interviews  
624 is the context in which the PCPs' practices are embedded. We found that this context  
625 influences the relative importance of other factors on PCPs' performance. For instance, a  
626 PCP with a person-centered leadership style appears to be even more important in the  
627 public sector than in the private sector. Indeed, the PCPs in the public sector don't always  
628 have the necessary decision space to enforce orders given in a command-and-control way.  
629 Also, lab tests, branded medicines and private health insurances were more available for the  
630 cases located in urban areas. This increases the availability of services, but it also provides  
631 more incentives for over prescription. The sociocultural and economic context indeed  
632 influence the practice of any profession, and this should be considered when designing  
633 interventions to improve health workers performance (21,34,35). The level of urbanization  
634 warrants a particular attention as the share of the urban population is quickly growing  
635 worldwide. In Benin, the urban population constituted 49.5% of the country's population in  
636 2022 and this proportion is projected to be 65.45% in 2050. In Western Africa, 63.80% of the  
637 population is expected to live in urban areas by 2050 (53). However, some positive factors  
638 seem easier to get in rural areas (for instance a good relationship with community leaders).  
639 Therefore, planning for primary care services and PCPs' practices should carefully consider  
640 how to not lose the advantages linked to the rural areas and avoid or work around the  
641 shortcomings inherent to urban settings.

642

643 **Factors with insufficient evidence regarding a potential influence on the PCPs' performance**  
644 Even though they were cited by the stakeholders as influencing factors, we did not find  
645 sufficient evidence at the cross-case analysis to conclude that the following factors influence  
646 the PCPs' performance in Benin: the equipment and infrastructure available for the PCPs'  
647 practices, the continuing education, the fulfillment of the PCPs' personal needs and the  
648 workload of the PCPs.

649

650 The lack of equipment and infrastructure and the quasi-inexistence of a well-structured  
651 continuing education system are common situations found across Benin's health system. In  
652 our study, we did indeed observe this lack of resources and continuing education in most of  
653 our cases, but we realized that those who performed well managed to overcome these  
654 issues. For example, in some sites PCPs managed to ensure good continuity of care despite  
655 the lack of digital patient records, which could have facilitated their work. Also, almost all  
656 the cases that had good results with patient-centered care managed to do so despite  
657 physical spaces that were not always appropriate. Finally, PCPs who had a leadership  
658 mandate, the necessary will or creativity, the necessary autonomy, or the right relationships  
659 with community leaders managed to gain access (even if temporarily) to resources for their  
660 work. Similarly, some of the cases in our sample were able to compensate for the lack of  
661 continuing education, thanks to peer support. Therefore, despite the importance of an  
662 adequate equipment (21) and continuous training (21,37), our results show that much can  
663 be done even with limited resources and other factors can help to have a good performance.

664 Other studies have also reported successful experiences of primary care provision in  
665 resource-limited settings and even in situations of fragility (35,54). This opens great  
666 possibilities in countries similar to Benin, with urgent need to improve the quality of care for  
667 their population but where the socio-economic situation will probably not allow the PCPs to  
668 get the same resources as PCPs in better-resourced countries.

669  
670 Regarding the workload, some studies found that a high number of patients negatively  
671 influences the physicians' performance(21). In our study, it was difficult to appreciate such  
672 influence, as the average numbers of patients seen daily by the PCPs was relatively low. Also,  
673 the PCPs with a high non-clinical workload in our sample were less available for patient care.  
674 This was compensated by nurse-practitioners, and we did not find enough evidence to  
675 conclude that it influences the PCPs' performance.

676

## 677 **Implications for practice**

### 678 [Contribution to international knowledge](#)

679 Most of the factors found in this study are consistent with previous knowledge. However,  
680 subtleties emerged from our study which are linked to the Benin context and to similar  
681 contexts in Africa and other regions with limited resources. In terms of strengthening  
682 knowledge and competencies, several approaches can be used: basic training and  
683 postgraduate training, of course, but also coaching and on-site support from peers and  
684 supervisors. Therefore, in countries where postgraduate training does not exist yet, actions  
685 can already be undertaken to have effective PCPs while waiting for postgraduate training  
686 programs. Similarly, we found that limited availability of key resources such as equipment,  
687 infrastructure, or continuing education can, to some degree, be compensated by a strong  
688 leadership, a good support from peer communities or health authorities to the PCPs.

689

690 The study also highlighted structural factors (preparation of the PCPs, shared values adapted  
691 to the context and to the expected results, etc.) which go beyond the individual  
692 characteristics of doctors but have great potential to influence their performance.

693 Addressing these structural factors could help to tackle the root causes of the  
694 underperformance of the PCPs and, more broadly, primary care systems.

695 Finally, this study provided empirical evidence that can be combined with the existing  
696 literature to build a theory on how the PCPs' performance can be supported in Benin and  
697 refine the conceptual framework used for this study. This refined conceptual framework can  
698 be used as a basis for a policy framework or to guide future efforts to analyze and improve  
699 the PCPs' performance in Benin and similar contexts.

700

### 701 [Building a theory and a refined conceptual framework](#)

702 A deep analysis of the factors identified in this study showed that they are interlinked and  
703 pathways to performance can be defined. These pathways include intermediary factors

704 (highlighted by the present study and previous literature) that can play a role in how a given  
 705 factor influences the PCPs' performance (figure 4).  
 706

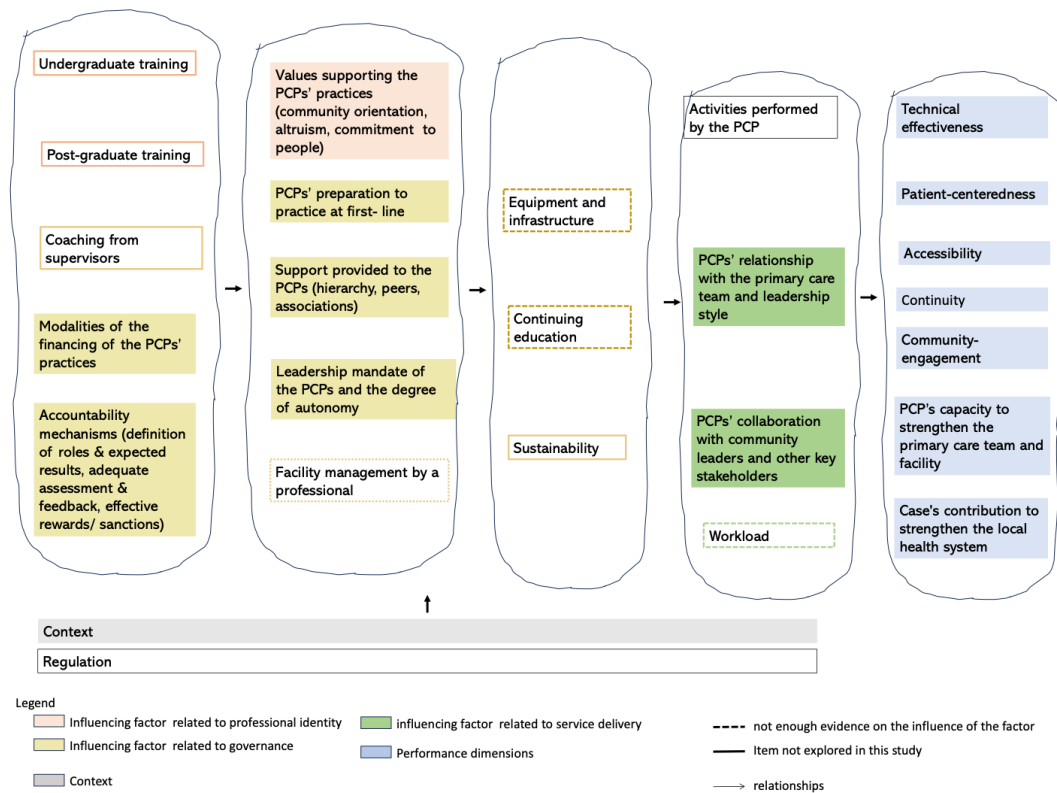

707  
 708 *Figure 4: Pathways to PCPs' performance in Benin*

709 The following theory can summarise the pathways shown by figure 4.  
 710 " If we offer adequate undergraduate training and adequate postgraduate training and/or  
 711 the right coaching, the right financing modalities, and effective accountability mechanisms,  
 712 we will have PCPs with the right values and the right preparation, with the necessary support  
 713 and with a leadership mandate and the autonomy to exert it. These PCPs are able to mobilize  
 714 the necessary resources (education and CME) to do their work and ensure the sustainability  
 715 of their practices. This in turn can allow the PCPs to perform their activities in good  
 716 collaboration and teamwork with the rest of the primary care team members and in  
 717 collaboration with the community leaders and other key stakeholders and with the  
 718 appropriate workload. All this leads to good performance, i.e the PCPs and their team  
 719 providing are that is technically effective, patient-centered, accessible, and community  
 720 oriented. The PCPs would also be able to strengthen her team and the PCPs' practices will  
 721 effectively contribute to strengthen the local health system. Getting a professional facility  
 722 manager (other than the PCP) can also help them in this reducing their workload, mobilizing  
 723 resources and achieving the results. This pathway to performance will be influenced by the  
 724 context and the right regulation can help maintaining it in a good direction".  
 725 From this theory, we build a refined conceptual framework displayed in figure 5.

726  
727

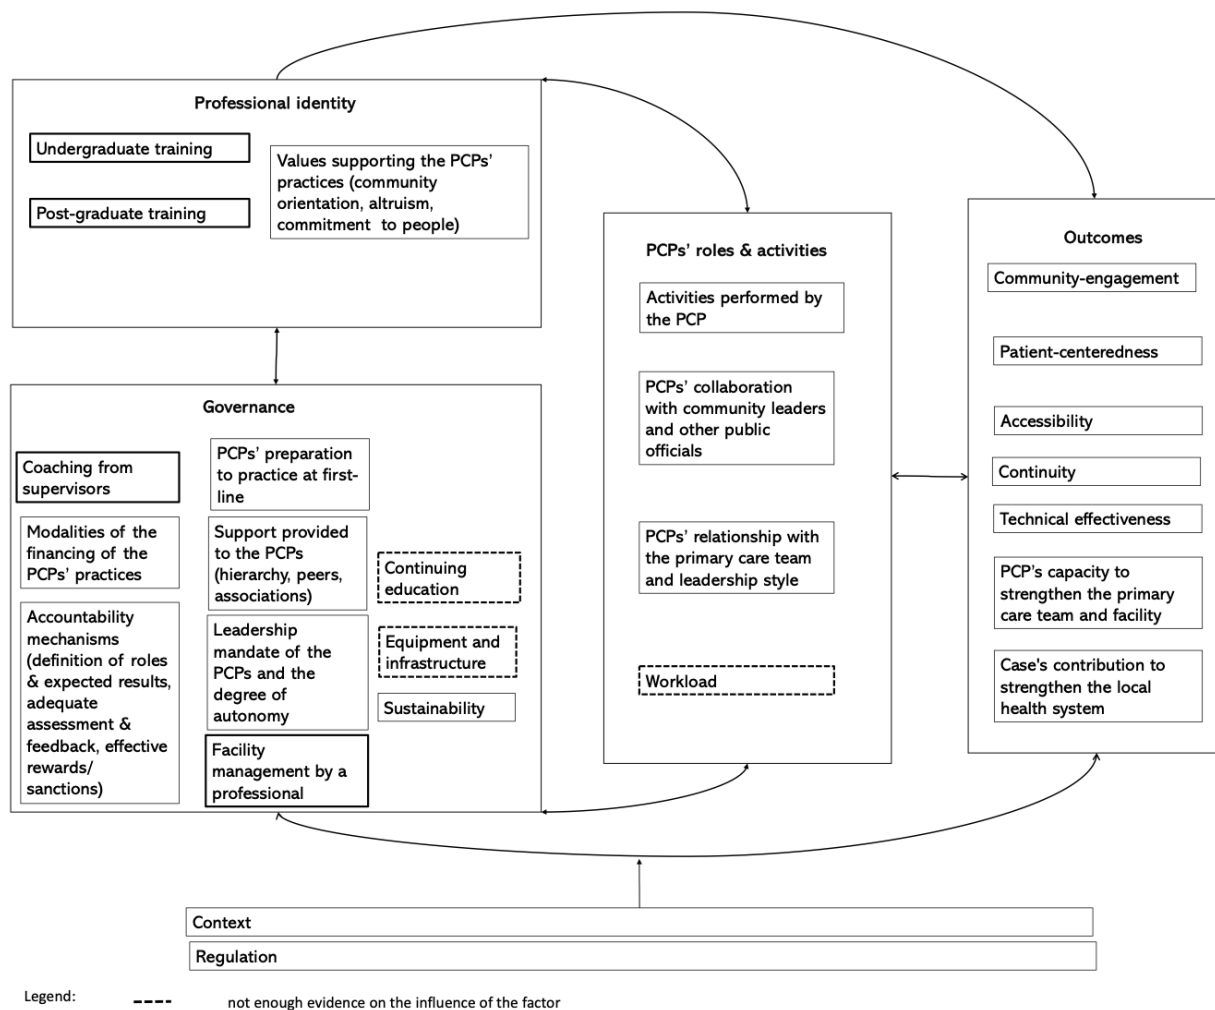

Figure 5: Refined conceptual framework for PCPs' performance

729  
730  
731  
732  
733  
734  
735  
736  
737  
738  
739  
740  
741  
742  
743

### Limitations and strengths

We used validated tools for assessing the performance of the PCPs but had only one observer to assess the consultations (instead of at least two as recommended for such assessment(29)). It was difficult to have more than one observer because of the small-sized consultation rooms and some reluctance from the PCPs and patients. This may have reduced the reliability of our findings. However, the triangulation between quantitative and qualitative data helped us to mitigate these insufficiencies. We also discussed the assessments at length between observer and principal instigator and enhance observer's inter-consultation variation. Another limitation is the low number of cases included in the multiple case study. There is thus room to study the range of factors influencing PCPs' performance on a larger sample and to test empirically the conceptual framework derived from these factors.

744 Despite these limitations, the study has several strengths. We achieved a reasonable level of  
745 variation in our sites in terms of performance, geographic localization, urbanization level,  
746 gender, and institutional ownership. This variation provided opportunities to observe  
747 similarities and differences across cases and note how a given factor would play a role (or  
748 not). This provides a certain level of confidence when concluding whether a factor was more  
749 likely than others to influence the performance of PCPs. We used an ethnographic approach  
750 with principal investigator and research assistants spending two months interviewing and  
751 observing the primary care teams and other key stakeholders in great depth. Finally, we  
752 succeeded in conducting 56 interviews allowing us to reach saturation of data.  
753

## 754 **Conclusion**

755 By triangulating data related to the stakeholders' perceptions, field observations of PCP  
756 practices and evidence from the literature, we can conclude that the following factors are  
757 key in shaping PCPs' performance in Benin: (i) the values supporting the PCPs' practices, (ii)  
758 the PCPs' preparation to practice at the first- line, (iii) the support provided to the PCPs from  
759 the hierarchy, peers or professional associations, (iv) the leadership mandate given to the  
760 PCPs and the degree of autonomy allocated to exert it, (v) the modalities of the financing of  
761 the PCPs' practices, (vi) the accountability mechanisms in place to support the PCPs'  
762 practices, (vii) the PCPs' relationship with the rest of the primary care team and their  
763 leadership style, (viii) the PCPs' collaboration with community leaders and other public  
764 officials, and (ix) the context in which the PCP's practices are embedded. Even if our  
765 methodology does not allow us to overgeneralize our findings, the factors highlighted in this  
766 study can further be tested in subsequent studies on PCPs' performance in other African  
767 countries. Moreover, the study clearly shows that the factors affecting the PCPs' and other  
768 health workers' performance are closely linked to the performance expected of them and to  
769 the specificities of their working arrangements and conditions. This reinforces the idea of a  
770 context-adapted policy framework being important for strengthening physician  
771 performance. The empirical evidence on the factors generated by this study can be  
772 leveraged to improve the PCPs' performance in Benin and similar contexts. It is a first step in  
773 the development of coherent policies with regard to the organization and regulation of PCPs'  
774 practices in Benin, and beyond in other West African countries with relatively similar health  
775 systems.  
776

## 777 **List of abbreviations**

778 Cot 2-3: Cotonou 2 and 3  
779 GP: General practitioner  
780 IQR: Interquartile ranges  
781 MGC : Médecin généraliste communautaire  
782 NKP: Nikki-Kalalé-Pèrèrè

783 OKT: Ouidah-Kpomassè-Tori

784 PN: Parakou-N'Dali

785 PCP: Primary care physician

786 PHC: Primary health care

787 qual (in lowercase letters): Non-dominant qualitative strand in a mixed method study

788 QUAN (in uppercase letters): Dominant quantitative strand in a mixed method study

## 789 **Declarations**

### 790 **Ethics approval and consent to participate**

791 This study was conducted under the ethical approval N° 1545/21 issued by the Institutional  
792 Review board of the Institute of Tropical Medicine of Antwerp, and the ethical approval N°  
793 0513 of the 1<sup>st</sup> March 2022, issued by the local ethic committee for biomedical research of  
794 the University of Parakou (Benin). Written consent was obtained from the participants, and  
795 we managed the data with strict confidentiality.

### 796 **Consent for publication**

797 Not applicable.

### 798 **Availability of data and materials**

799 The data supporting the finding are included in the tables in this published article and its  
800 supplementary information files. More information is available from the corresponding  
801 author (KB) if needed and on reasonable request.

### 802 **Competing interests**

803 The authors declare that they have no competing interests.

### 804 **Funding**

805 The study was conducted with funding from a PhD grant allocated by the DGD Belgium,  
806 through the Institute of Tropical Medicine of Antwerp. The authors also received funds from  
807 the KU Leuven for conducting a multi-stakeholders workshop for validating the finding and  
808 using the results to develop a policy framework for the practice of PCPs in Benin.

### 809 **Authors' contributions**

810 KB co-conceptualized the study, coordinated the data collection, curated the data,  
811 performed quantitative and qualitative data analysis, and produced the first draft of the  
812 manuscript. JDL and BC co-conceptualized the study, supervised the research process,  
813 contributed to the data analysis, and reviewed the manuscript drafts. DMZ supervised the  
814 research process and reviewed the manuscript drafts. All authors have read and approved  
815 the manuscript.

### 816 **Acknowledgements**

## 817 **References**

- 818 1. United Nations General Assembly. Transforming our world: the 2030 Agenda for  
819 Sustainable Development Transforming our world: the 2030 Agenda for Sustainable  
820 Development Preamble. 2015.
- 821 2. Global strategy on human resources for health: Workforce 2030.



- 822 3. Bosongo SI, Mukalenge FC, Tambwe AM, Criel B. Les médecins prestataires à la  
823 première ligne des soins dans la ville de Kisangani en République Démocratique du  
824 Congo : vers une typologie. *Afr J Prim Health Care Fam Med* [Internet]. 2021 Sep 6  
825 [cited 2022 Sep 28];13(1):8. Available from:  
826 <https://phcfm.org/index.php/phcfm/article/view/2617/4879>
- 827 4. Bello K, De Lepeleire J, Kabinda M. J, Bosongo S, Dossou JP, Waweru E, et al. The  
828 expanding movement of primary care physicians operating at the first line of  
829 healthcare delivery systems in sub-Saharan Africa: A scoping review. *PLoS One*  
830 [Internet]. 2021 Oct 22 [cited 2021 Nov 7];16(10):e0258955. Available from:  
831 <https://pubmed.ncbi.nlm.nih.gov/34679111/>
- 832 5. Eyal N, Cancedda C, Kyamanywa P, Hurst SA. Non-physician Clinicians in Sub-Saharan  
833 Africa and the Evolving Role of Physicians. *Int J Health Policy Manag* [Internet].  
834 2015;5(3):149–53. Available from: [http://ijhpm.com/article\\_3144\\_629.html](http://ijhpm.com/article_3144_629.html)
- 835 6. Willcox ML, Peersman W, Daou P, Diakité C, Bajunirwe F, Mubangizi V, et al. Human  
836 resources for primary health care in sub-Saharan Africa: progress or stagnation? *Hum*  
837 *Resour Health* [Internet]. 2015 [cited 2019 Apr 8];13(76). Available from:  
838 [https://www.ncbi.nlm.nih.gov/pmc/articles/PMC4566492/pdf/12960\\_2015\\_Article\\_7](https://www.ncbi.nlm.nih.gov/pmc/articles/PMC4566492/pdf/12960_2015_Article_73.pdf)  
839 [3.pdf](https://www.ncbi.nlm.nih.gov/pmc/articles/PMC4566492/pdf/12960_2015_Article_73.pdf)
- 840 7. Desplats D, Koné Y, Razakarison C. 28 Pour une médecine générale communautaire en  
841 première ligne. *Med Trop* [Internet]. 2004;64(6):539–44. Available from:  
842 [http://files/2858/DESPLATS et al. - 2004 - Pour une médecine générale](http://files/2858/DESPLATS et al. - 2004 - Pour une médecine générale communautaire en première.pdf)  
843 [communautaire en première.pdf](http://files/2858/DESPLATS et al. - 2004 - Pour une médecine générale communautaire en première.pdf)
- 844 8. Bello K, De Lepeleire J, Agossou C, Apers L, Zannou DM, Criel B. Lessons Learnt From  
845 the Experiences of Primary Care Physicians Facing COVID-19 in Benin: A Mixed-  
846 Methods Study. *Frontiers in Health Services* [Internet]. 2022 Mar 29 [cited 2022 Apr  
847 30];2:11. Available from:  
848 <https://www.frontiersin.org/articles/10.3389/frhs.2022.843058/full>
- 849 9. KB VP, RJ M, L BR, RPG B, I G, WJ S, et al. The Influence of Family Physicians Within the  
850 South African District Health System: A Cross-Sectional Study. *Ann Fam Med*. 2018  
851 Jan;16(1):28–36.
- 852 10. Jenkins LS, Von Pressentin KB, Naidoo K, Schaefer R. The evolving role of family  
853 physicians during the coronavirus disease 2019 crisis: An appreciative reflection. *Afr J*  
854 *Prim Health Care Fam Med* [Internet]. 2020 Jun 9;12(1):a2478. Available from:  
855 <http://www.phcfm.org/index.php/PHCFM/article/view/2478>
- 856 11. Codjia L, Jabot F DH, Laurence C, Françoise J, Henri D. Évaluation du programme  
857 d'appui à la médicalisation des aires de santé rurales au Mali. *Accroître l'accès aux*  
858 *personnels de santé dans les zones rurales ou reculées. Étude de cas N°2. Vol. No2.*  
859 *Copenhague: OMS; 2010.*
- 860 12. Swanepoel M, Mash B, Naledi T. Assessment of the impact of family physicians in the  
861 district health system of the Western Cape, South Africa. *Afr J Prim Health Care Fam*  
862 *Med*. 2014 Dec;6(1):E1-8.

- 863 13. KB VP, RJ M, L BR, RPG B, I G, WJ S, et al. The bird's-eye perspective: how do district  
864 health managers experience the impact of family physicians within the South African  
865 district health system? A qualitative study. *South African Fam Pract.* 2018;60(1):13–  
866 20.
- 867 14. Flinkenflögel M, Sethlare V, Cubaka VK, Makasa M, Guyse A, de Maeseneer J. A  
868 scoping review on family medicine in sub-Saharan Africa: Practice, positioning and  
869 impact in African health care systems. *Hum Resour Health.* 2020;18(1):1–18.
- 870 15. Beogo I, Darboe A, Adesanya OA, Rojas BM. Choosing between nurse-led and medical  
871 doctor-led from private for-profit versus non-for-profit health facilities: A household  
872 survey in urban Burkina Faso. *PLoS One.* 2018 Jul 1;13(7):e0200233.
- 873 16. lipinge SN, Pretorius L. The Delivery and Quality of Sexually Transmitted Infections  
874 Treatment by Private General Practitioners in Windhoek Namibia. *Glob J Health Sci.*  
875 2012 Aug;4(5):156–71.
- 876 17. Jan T, AILLET S, Com. UVSB 2. BordeauxFRA/. De Tananarive au Caire : un aperçu du  
877 métier de médecin généraliste libéral dans le contexte des systèmes de santé locaux.  
878 [Bordeaux]; 2011.
- 879 18. Houenassi MDD, Codjo LHLH, Dokoui D, Dohou SHM, Wanvoegbe A, Agbodande A, et  
880 al. Management of arterial hypertension in Cotonou city, Benin: general practitioners'  
881 knowledge, attitudes and practice. *Cardiovasc J Afr.* 2016 Aug;27(4):1–6.
- 882 19. Mukiapini S, Bresick G, Sayed AR, Le Grange C. Baseline measures of primary health  
883 care team functioning and overall primary health care performance at Du Noon  
884 Community Health Centre. *Afr J Prim Health Care Fam Med.* 2018 Sep;10(1):e1–11.
- 885 20. Palmer N, Mills A, Wade H, Gilson L, Schneider H. A new face for private providers in  
886 developing countries: what implications for public health? *Bull World Health Organ.*  
887 2003;81(4):292–7.
- 888 21. Wenghofer EF, Williams AP. Factors Affecting Physician Performance: Implications for  
889 Performance Improvement and Governance Facteurs qui influent sur le rendement  
890 des médecins : répercussions pour l' amélioration du rendement et pour la  
891 gouvernance. Vol. 5, *hEalthCarE PoliCY.* 2009.
- 892 22. Webster F, Rice K. Conducting ethnography in primary care. *Fam Pract.* 2019 Aug  
893 1;36(4):523–5.
- 894 23. Donabedian A. Evaluating the quality of medical care. Reprinted 1966 article. *Milbank*  
895 *Q [Internet].* 2005;83(4):691–729. Available from:  
896 <http://www.ncbi.nlm.nih.gov/pubmed/16279964>  
897 <http://www.pubmedcentral.nih.gov/articlerender.fcgi?artid=PMC2690293>
- 898 24. Kringos DS, Boerma GW, Hutchinson A, van der Zee J, Groenewegen PP. The  
899 Breadth of primary care - Addfiles. *BMC Health Serv Res.* 2010;18(3):72–72.
- 900 25. Van Olmen J, Criel B, Bhojani U, Marchal B, Van Belle S, Chenge MF, et al. The health  
901 system dynamics framework: the introduction of an analytical model for health  
902 system analysis and its application to two case-studies. *Health Cult Soc [Internet].*  
903 2012;2(1):1–21. Available from: <http://hcs.pitt.edu/ojs/index.php/hcs/article/view/71>

- 904 26. World Health Organization (WHO). Primary Health Care: now more than ever  
905 [Internet]. Geneva: WHO press; 2008. Available from:  
906 <https://apps.who.int/iris/handle/10665/43949>
- 907 27. World Health Organization, the United Nations Children's Fund. Primary health care  
908 measurement framework and indicators: monitoring health systems through a  
909 primary health care lens [Internet]. Geneva; 2022 [cited 2023 Jan 9]. Available from:  
910 <https://www.who.int/publications/i/item/9789240044210>
- 911 28. Criel B, Bello K, Tawaytibhongs O, Waweru E. The growing presence of medical  
912 doctors at first line healthcare level in Benin, Thailand and Uganda: a multifaceted  
913 phenomenon - The European Conference of Family Doctors 2020. In: European  
914 Conference of Family Doctors [Internet]. Berlin/Online; 2020 [cited 2021 Aug 25].  
915 Available from: <https://wonca2020.confex.net/en/lecture?objid=1204>
- 916 29. Burt J, Abel G, Elmore N, Campbell J, Roland M, Benson J, et al. Assessing  
917 communication quality of consultations in primary care: initial reliability of the Global  
918 Consultation Rating Scale, based on the Calgary-Cambridge Guide to the Medical  
919 Interview. *BMJ Open* [Internet]. 2014;4(3):e004339. Available from:  
920 <http://bmjopen.bmj.com/lookup/doi/10.1136/bmjopen-2013-004339>
- 921 30. Lagarde M, Burn S, Lawin L, Bello K, Dossou J paul, Goufodji BS, et al. Exploring the  
922 Impact of Performance-Based Financing on Health Workers' Performance in Benin.  
923 Cotonou; 2015.
- 924 31. Braun V, Clarke V. Using thematic analysis in psychology.
- 925 32. Home | Dedoose [Internet]. [cited 2021 Jun 4]. Available from:  
926 <https://www.dedoose.com/>
- 927 33. Khan S, VanWynsberghe R. Cultivating the Under-Mined: Cross-Case Analysis as  
928 Knowledge Mobilization. *Forum Qualitative Sozialforschung / Forum: Qualitative  
929 Social Research* [Internet]. 2008 Jan 31 [cited 2023 May 30];9(1). Available from:  
930 <https://www.qualitative-research.net/index.php/fqs/article/view/334/729>
- 931 34. Dieleman M, Harnmeijer J. Improving health worker performance: in search of  
932 promising practices. 2006.
- 933 35. Mabuchi S, Sesan T, Bennett SC. Pathways to high and low performance: Factors  
934 differentiating primary care facilities under performance-based financing in Nigeria.  
935 *Health Policy Plan*. 2018 Jan 1;33(1):41–58.
- 936 36. Asabir K, Witter S, Herbst CH, Dedzo KM, Appiah-Denkyira E, Soucat A, et al. World  
937 Bank Report Part Title: The Performance of Health Workers Report Part Title: Toward  
938 Interventions in Human Resources for Health in Ghana Report Subtitle: Evidence for  
939 Health Workforce Planning and Results.
- 940 37. Awases MH, Bezuidenhout MC, Roos JH. Factors affecting the performance of  
941 professional nurses in Namibia. *Curationis*. 2013;36(1):E1–8.
- 942 38. Irimu GW, Greene A, Gathara D, Kihara H, Maina C, Mbori-Ngacha D, et al. Factors  
943 influencing performance of health workers in the management of seriously sick

- 944 children at a Kenyan tertiary hospital - Participatory action research. *BMC Health Serv*  
945 *Res.* 2014 Feb 7;14.
- 946 39. Barker Caza B, Creary S. The construction of professional identity. *Perspectives on*  
947 *Contemporary Professional Work.* 2016;259–85.
- 948 40. Voort CTM V, G VK, P C, GJ D, van der Voort CTM, van Kasteren G, et al. What  
949 challenges hamper Kenyan family physicians in pursuing their family medicine  
950 mandate? A qualitative study among family physicians and their colleagues. *BMC Fam*  
951 *Pract [Internet].* 2012 Apr;Apr;13(32)(1):32. Available from:  
952 <http://bmcfampract.biomedcentral.com/articles/10.1186/1471-2296-13-32>
- 953 41. M VD. L'introduction des sciences sociales dans une expérience de formation  
954 professionnelle des médecins de campagne au Mali. In: *Colloque International*  
955 *Amades : Proceedings of the international colloquium of Anthropology and Medicine.*  
956 *Marseille, France. French;*
- 957 42. Mash R, Downing R, Moosa S, De Maeseneer J. Exploring the key principles of family  
958 medicine in sub-Saharan Africa: international Delphi consensus process. *South African*  
959 *Fam Pract.* 2008;50(3):60–5.
- 960 43. Cauli M. Contribution of humanities and social sciences to the training of healthcare  
961 professionals in Africa: An experience in the context of the mother and child Priority  
962 Solidarity Fund. *Sante Publique (Paris).* 2013;25(6):857–61.
- 963 44. Green LA, Yawn B p, Lanier D, Dovey SM. The ecology of medical care revisited. *N Engl*  
964 *J Med.* 2001;344(26):2021–5.
- 965 45. Moosa S. Family doctor leadership in African primary health care. *Afr J Prim Health*  
966 *Care Fam Med.* 2021;13(1):1–2.
- 967 46. Kjeldmand D, Holmström I. Balint groups as a means to increase job satisfaction and  
968 prevent burnout among general practitioners. *Ann Fam Med.* 2008 Mar;6(2):138–45.
- 969 47. Travis P, Egger D, Davies P, Mechbal A, Travis P, Egger D, et al. Towards better  
970 stewardship: concepts and critical issues. [cited 2018 Apr 3]; Available from:  
971 <http://www.who.int/healthinfo/paper48.pdf>
- 972 48. Moosa S, Peersman W, Derese A, Kidd M, Pettigrew LM, Howe A, et al. Emerging role  
973 of family medicine in South Africa. *BMJ Glob Health.* 2018;3:2–4.
- 974 49. Hellowell M, Myburgh A, Sjoblom M, Gurazada S, Clarke D. Covid-19 and the collapse  
975 of the private health sector: a threat to countries' response efforts and the future of  
976 health systems strengthening? [Internet]. Geneva; 2020 [cited 2021 Aug 9]. Available  
977 from: [https://hsgovcollab.org/system/files/2020-06/Covid-19 and the collapse of the](https://hsgovcollab.org/system/files/2020-06/Covid-19%20and%20the%20collapse%20of%20the%20private%20health%20sector-%20a%20threat%20to%20countries'%20response%20efforts%20and%20the%20future%20of%20health%20systems%20strengthening_0.pdf)  
978 [private health sector- a threat to countries' response efforts and the future of health](https://hsgovcollab.org/system/files/2020-06/Covid-19 and the collapse of the private health sector- a threat to countries' response efforts and the future of health systems strengthening_0.pdf)  
979 [systems strengthening\\_0.pdf](https://hsgovcollab.org/system/files/2020-06/Covid-19 and the collapse of the private health sector- a threat to countries' response efforts and the future of health systems strengthening_0.pdf)
- 980 50. Expert Panel on Effective Ways of Investing in Health. Definition of a frame of  
981 reference in relation to primary care with a special emphasis on financing systems and  
982 referral systems. Brussels: European Commission; 2014.
- 983 51. Bregman P. The Right Way to Hold People Accountable. *Harv Bus Rev [Internet].*  
984 2016;2–4. Available from:

985 [http://search.ebscohost.com/login.aspx?direct=true&AuthType=ip,url,uid&db=buh&A](http://search.ebscohost.com/login.aspx?direct=true&AuthType=ip,url,uid&db=buh&AN=118685714&lang=fr&site=ehost-live)  
986 [N=118685714&lang=fr&site=ehost-live](http://search.ebscohost.com/login.aspx?direct=true&AuthType=ip,url,uid&db=buh&AN=118685714&lang=fr&site=ehost-live)

987 52. Bitton A, Ratcliffe H, Schwarz D, Fifield J, Benotti E, Huskey B. Primary health care  
988 system performance in low and middle-income countries : a rapid scoping review of  
989 the evidence from 2010-2017. Geneva: the PHC Research Consortium;

990 53. The World Bank. DataBank: World Development Indicators [Internet]. 2023 [cited  
991 2023 Aug 9]. Available from:

992 <https://databank.worldbank.org/reports.aspx?dsid=2&series=SP.URB.TOTL.IN.ZS>

993 54. Nimpagaritse M, Korachais C, Meessen B. Effects in spite of tough constraints  
994 - A theory of change based investigation of contextual and implementation factors  
995 affecting the results of a performance based financing scheme extended to  
996 malnutrition in Burundi. PLoS One. 2020;15(1):e0226376.

997

998

999 **Supporting information captions**

1000 Supplementary file 1: Factor loading table

1001 Supplementary file 2: Cross case analysis simplified matrix.docx

1002 Supplementary file 3: Details cross-case analysis final

1003
